# Supplementary material for: Organotin metalloligands for selective sensing of metal ions
Source: Royal Society of Chemistry journal article supplement (doi:10.1039/c9nj00944b), 2019-01-01
Supplement: c9nj00944b1.pdf [file c9nj00944b1.pdf]

# Electronic Supplementary Information

## Table of contents

| Figure/Table | Content                                                                                                                                                                                                                                                                                                      | Page number |
|--------------|--------------------------------------------------------------------------------------------------------------------------------------------------------------------------------------------------------------------------------------------------------------------------------------------------------------|-------------|
| Figure S1    | FT-IR spectrum of complex <b>1</b>                                                                                                                                                                                                                                                                           | 4           |
| Figure S2    | FT-IR spectrum of complex <b>2</b>                                                                                                                                                                                                                                                                           | 4           |
| Figure S3    | FT-IR spectrum of complex <b>3</b>                                                                                                                                                                                                                                                                           | 5           |
| Figure S4    | FT-IR spectrum of complex <b>4</b>                                                                                                                                                                                                                                                                           | 5           |
| Figure S5    | $^1\text{H}$ NMR spectrum of complex <b>1</b> recorded in $\text{CDCl}_3$                                                                                                                                                                                                                                    | 6           |
| Figure S6    | $^{13}\text{C}\{^1\text{H}\}$ NMR spectrum of complex <b>1</b> recorded in $\text{CDCl}_3$                                                                                                                                                                                                                   | 6           |
| Figure S7    | $^{119}\text{Sn}$ NMR spectrum of complex <b>1</b> recorded in $\text{CDCl}_3$                                                                                                                                                                                                                               | 7           |
| Figure S8    | $^1\text{H}$ NMR spectrum of complex <b>2</b> recorded in $\text{CDCl}_3$                                                                                                                                                                                                                                    | 7           |
| Figure S9    | $^{13}\text{C}\{^1\text{H}\}$ NMR spectrum of complex <b>2</b> recorded in $\text{CDCl}_3$                                                                                                                                                                                                                   | 8           |
| Figure S10   | $^{119}\text{Sn}$ NMR spectrum of complex <b>2</b> recorded in $\text{CDCl}_3$                                                                                                                                                                                                                               | 8           |
| Figure S11   | $^1\text{H}$ NMR spectrum of complex <b>3</b> recorded in $\text{CDCl}_3$                                                                                                                                                                                                                                    | 9           |
| Figure S12   | $^{13}\text{C}\{^1\text{H}\}$ NMR spectrum of complex <b>3</b> recorded in $\text{CDCl}_3$                                                                                                                                                                                                                   | 9           |
| Figure S13   | $^{119}\text{Sn}$ NMR spectrum of complex <b>3</b> recorded in $\text{CDCl}_3$                                                                                                                                                                                                                               | 10          |
| Figure S14   | $^1\text{H}$ NMR spectrum of complex <b>4</b> recorded in $\text{CDCl}_3$                                                                                                                                                                                                                                    | 10          |
| Figure S15   | $^{13}\text{C}\{^1\text{H}\}$ NMR spectrum of complex <b>4</b> recorded in $\text{CDCl}_3$                                                                                                                                                                                                                   | 11          |
| Figure S16   | $^{119}\text{Sn}$ NMR spectrum of complex <b>4</b> recorded in $\text{CDCl}_3$                                                                                                                                                                                                                               | 11          |
| Figure S17   | Naked-eye colour changes observed due to the addition of equivalent amounts of metal salts in complex <b>2</b>                                                                                                                                                                                               | 12          |
| Figure S18   | Naked-eye colour changes observed due to the addition of equivalent amounts of metal salts in complex <b>3</b>                                                                                                                                                                                               | 12          |
| Figure S19   | Naked-eye colour changes observed due to the addition of equivalent amounts of metal salts in complex <b>4</b>                                                                                                                                                                                               | 12          |
| Figure S20   | Absorption spectral variation of complex <b>1</b> ( $2 \times 10^{-5}$ mol $\text{dm}^{-3}$ ) with the addition of 1-5 equivalent of nitrate salts ( $2 \times 10^{-4}$ mol $\text{dm}^{-3}$ ) of (a) $\text{Ag}^+$ (b) $\text{Ba}^{2+}$ (c) $\text{Cd}^{2+}$ (d) $\text{Co}^{2+}$ in DCM-methanol (1:9).    | 13          |
| Figure S21   | Absorption spectral variation of complex <b>1</b> ( $2 \times 10^{-5}$ mol $\text{dm}^{-3}$ ) with the addition of 1-5 equivalent of nitrate salts ( $2 \times 10^{-4}$ mol $\text{dm}^{-3}$ ) of (e) $\text{Cr}^{3+}$ (f) $\text{Mn}^{2+}$ (g) $\text{Ni}^{2+}$ (h) $\text{Zn}^{2+}$ in DCM-methanol (1:9). | 14          |
| Figure S22   | Absorption spectral variation of complex <b>2</b> ( $2 \times 10^{-5}$ mol $\text{dm}^{-3}$ ) with the addition of 1-5 equivalent of nitrate salts ( $2 \times 10^{-4}$ mol $\text{dm}^{-3}$ ) of (a) $\text{Ag}^+$ (b) $\text{Ba}^{2+}$ (c) $\text{Cd}^{2+}$ (d) $\text{Co}^{2+}$ in DCM-methanol (1:9).    | 15          |
| Figure S23   | Absorption spectral variation of complex <b>2</b> ( $2 \times 10^{-5}$ mol $\text{dm}^{-3}$ ) with the addition of 1-5 equivalent of nitrate salts ( $2 \times 10^{-4}$ mol $\text{dm}^{-3}$ ) of (e) $\text{Cr}^{3+}$ (f) $\text{Mn}^{2+}$ (g) $\text{Ni}^{2+}$ (h) $\text{Zn}^{2+}$ in DCM-methanol (1:9)  | 16          |

|            |                                                                                                                                                                                                                                                                                                                                                                                                                                                                                                                                 |    |
|------------|---------------------------------------------------------------------------------------------------------------------------------------------------------------------------------------------------------------------------------------------------------------------------------------------------------------------------------------------------------------------------------------------------------------------------------------------------------------------------------------------------------------------------------|----|
| Figure S24 | Absorption spectral variation of complex <b>3</b> ( $2 \times 10^{-5}$ mol $\text{dm}^{-3}$ ) with the addition of 1-5 equivalent of nitrate salts ( $2 \times 10^{-4}$ mol $\text{dm}^{-3}$ ) of <b>(a)</b> $\text{Ag}^+$ <b>(b)</b> $\text{Ba}^{2+}$ <b>(c)</b> $\text{Cd}^{2+}$ <b>(d)</b> $\text{Co}^{2+}$ in DCM-methanol (1:9)                                                                                                                                                                                            | 17 |
| Figure S25 | Absorption spectral variation of complex <b>3</b> ( $2 \times 10^{-5}$ mol $\text{dm}^{-3}$ ) with the addition of 1-5 equivalent of nitrate salts ( $2 \times 10^{-4}$ mol $\text{dm}^{-3}$ ) of <b>(e)</b> $\text{Cr}^{3+}$ <b>(f)</b> $\text{Mn}^{2+}$ <b>(g)</b> $\text{Ni}^{2+}$ <b>(h)</b> $\text{Zn}^{2+}$ in DCM-methanol (1:9)                                                                                                                                                                                         | 18 |
| Figure S26 | Absorption spectral variation of complex <b>4</b> ( $2 \times 10^{-5}$ mol $\text{dm}^{-3}$ ) with the addition of 1-5 equivalent of nitrate salts ( $2 \times 10^{-4}$ mol $\text{dm}^{-3}$ ) of <b>(a)</b> $\text{Ag}^+$ <b>(b)</b> $\text{Ba}^{2+}$ <b>(c)</b> $\text{Cd}^{2+}$ <b>(d)</b> $\text{Co}^{2+}$ in DCM-methanol (1:9)                                                                                                                                                                                            | 19 |
| Figure S27 | Absorption spectral variation of complex <b>4</b> ( $2 \times 10^{-5}$ mol $\text{dm}^{-3}$ ) with the addition of 1-5 equivalent of nitrate salts ( $2 \times 10^{-4}$ mol $\text{dm}^{-3}$ ) of <b>(e)</b> $\text{Cr}^{3+}$ <b>(f)</b> $\text{Mn}^{2+}$ <b>(g)</b> $\text{Ni}^{2+}$ <b>(h)</b> $\text{Zn}^{2+}$ in DCM-methanol (1:9)                                                                                                                                                                                         | 20 |
| Figure S28 | Absorption spectral variation of complex <b>2</b> and <b>4</b> ( $2 \times 10^{-5}$ mol $\text{dm}^{-3}$ ) with the addition of 1-5 equivalent of ferric nitrate nonahydrate ( $2 \times 10^{-4}$ mol $\text{dm}^{-3}$ ) in DCM-methanol (1:9)                                                                                                                                                                                                                                                                                  | 21 |
| Figure S29 | <b>(a)</b> Absorption spectral variation of complex <b>2</b> ( $2 \times 10^{-5}$ mol $\text{dm}^{-3}$ ) with the addition of 1-5 equivalent of copper(II) nitrate trihydrate ( $2 \times 10^{-4}$ mol $\text{dm}^{-3}$ ) in DCM-methanol (1:9). <b>(b)</b> The stoichiometric plot of complex <b>2</b> with copper(II) nitrate trihydrate. <b>(c)</b> Job's plot of Complex <b>2</b> with copper(II) nitrate trihydrate. <b>(d)</b> Benesi-Hildebrand plot Complex <b>2</b> with the addition of copper(II) nitrate trihydrate | 22 |
| Figure S30 | <b>(a)</b> Absorption spectral variation of complex <b>3</b> ( $2 \times 10^{-5}$ mol $\text{dm}^{-3}$ ) with the addition of 1-5 equivalent of copper(II) nitrate trihydrate ( $2 \times 10^{-4}$ mol $\text{dm}^{-3}$ ) in DCM-methanol (1:9). <b>(b)</b> The stoichiometric plot of complex <b>3</b> with copper(II) nitrate trihydrate. <b>(c)</b> Job's plot of Complex <b>3</b> with copper(II) nitrate trihydrate. <b>(d)</b> Benesi-Hildebrand plot Complex <b>3</b> with the addition of copper(II) nitrate trihydrate | 23 |
| Figure S31 | <b>(a)</b> Absorption spectral variation of complex <b>3</b> ( $2 \times 10^{-5}$ mol $\text{dm}^{-3}$ ) with the addition of 1-5 equivalent of ferric nitrate nonahydrate ( $2 \times 10^{-4}$ mol $\text{dm}^{-3}$ ) in DCM-methanol (1:9). <b>(b)</b> The stoichiometric plot of Complex <b>3</b> with ferric nitrate nonahydrate. <b>(c)</b> Job's plot of Complex <b>3</b> with ferric nitrate nonahydrate. <b>(d)</b> Benesi-Hildebrand plot Complex <b>3</b> with the addition of ferric nitrate nonahydrate.            | 24 |

|            |                                                                                                                                                                                                                                                                                                                                                                                                                                                                                                  |       |
|------------|--------------------------------------------------------------------------------------------------------------------------------------------------------------------------------------------------------------------------------------------------------------------------------------------------------------------------------------------------------------------------------------------------------------------------------------------------------------------------------------------------|-------|
| Figure S32 | (a) Absorption spectral variation of complex <b>4</b> ( $2 \times 10^{-5}$ mol $\text{dm}^{-3}$ ) with the addition of 1-5 equivalent of copper nitrate trihydrate ( $2 \times 10^{-4}$ mol $\text{dm}^{-3}$ ) in DCM-methanol (1:9). (b) The stoichiometric plot of Complex <b>4</b> with copper(II) nitrate trihydrate. (c) Job's plot of Complex <b>4</b> with copper(II) nitrate trihydrate. (d) Benesi-Hildebrand plot Complex <b>4</b> with the addition of copper(II) nitrate trihydrate. | 25    |
| Figure S33 | Changes in partial $^1\text{H}$ NMR spectra of complex <b>1</b> with the addition of an equivalent amount of selected metal ions in DMSO-d-6.                                                                                                                                                                                                                                                                                                                                                    | 26-27 |
| Figure S34 | Graph between absorbance and concentration of guest for calculation of slope for (a) $\text{Cu}^{2+}$ (b) $\text{Fe}^{3+}$ for complex <b>1</b>                                                                                                                                                                                                                                                                                                                                                  | 28    |
| Figure S35 | Graph between absorbance and concentration of guest for calculation of slope for (a) $\text{Cu}^{2+}$ (b) $\text{Fe}^{3+}$ for complex <b>3</b>                                                                                                                                                                                                                                                                                                                                                  | 28    |
| Figure S36 | Graph between absorbance and concentration of guest for calculation of slope for (a) $\text{Cu}^{2+}$ for complex <b>2</b> (b) $\text{Cu}^{2+}$ for complex <b>4</b>                                                                                                                                                                                                                                                                                                                             | 29    |

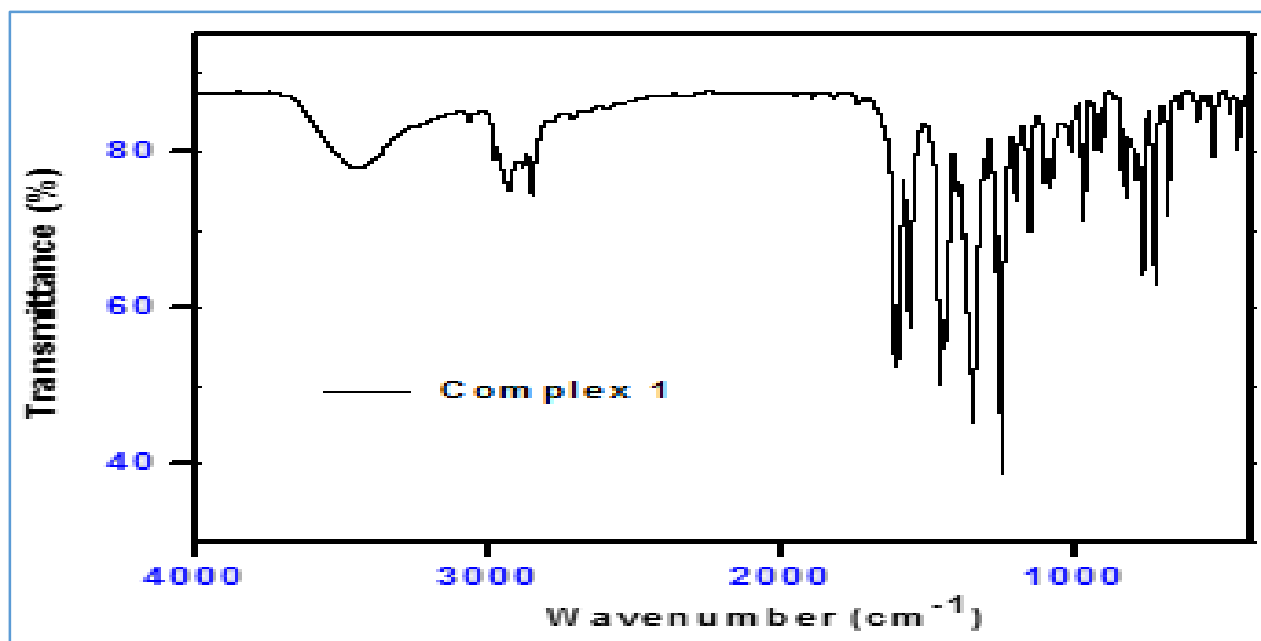

Figure S1: FT-IR spectrum of complex 1.

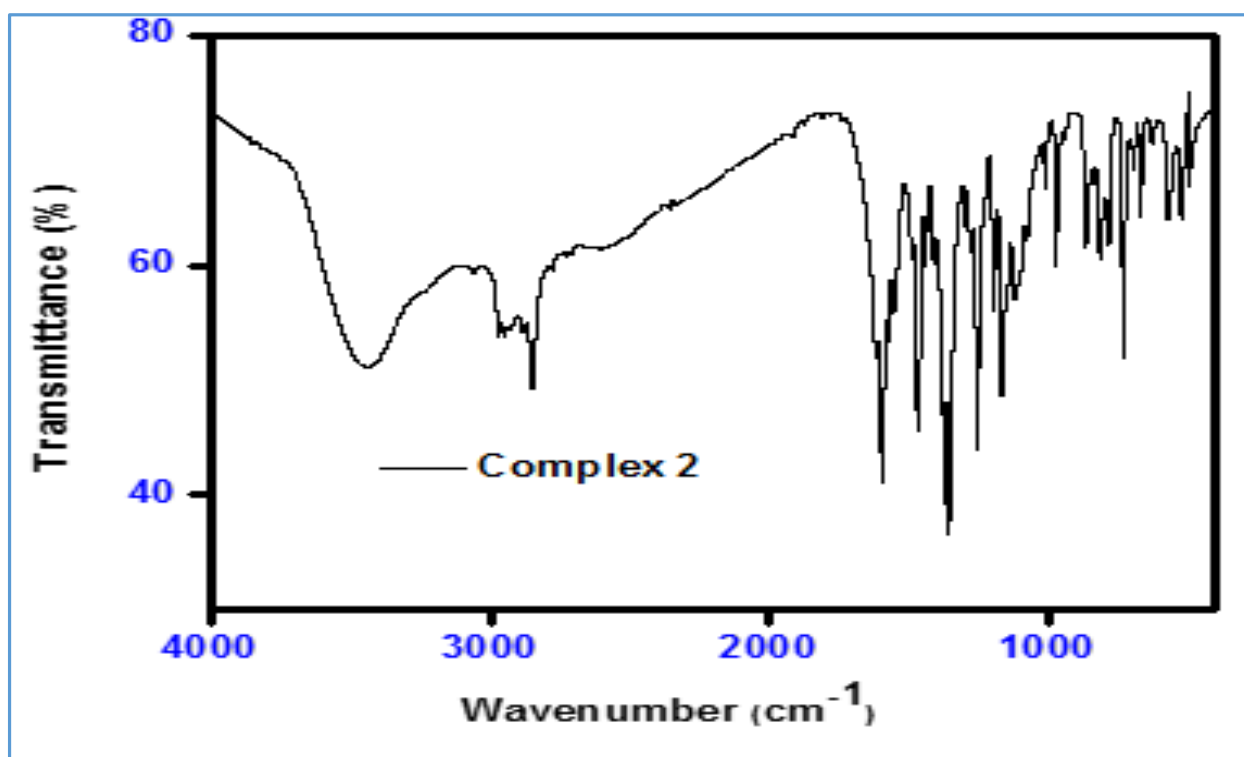

Figure S2: FT-IR spectrum of complex 2

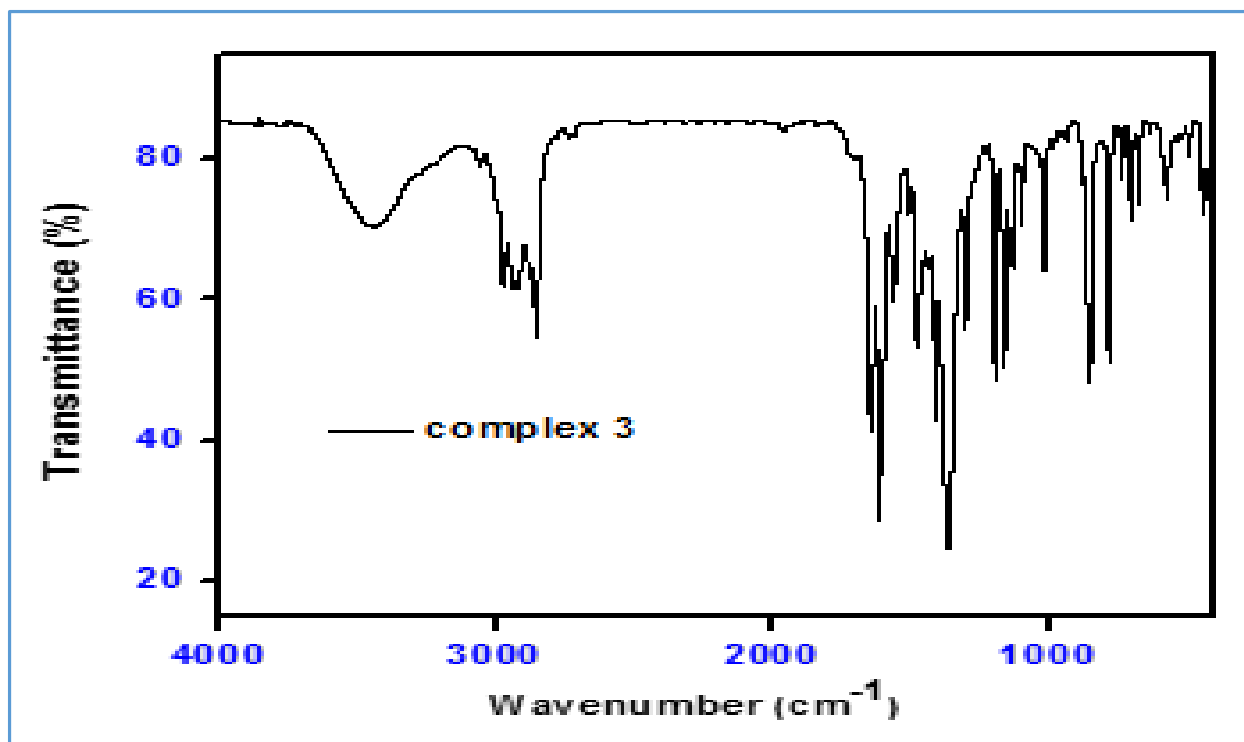

Figure S3: FT-IR spectrum of complex 3.

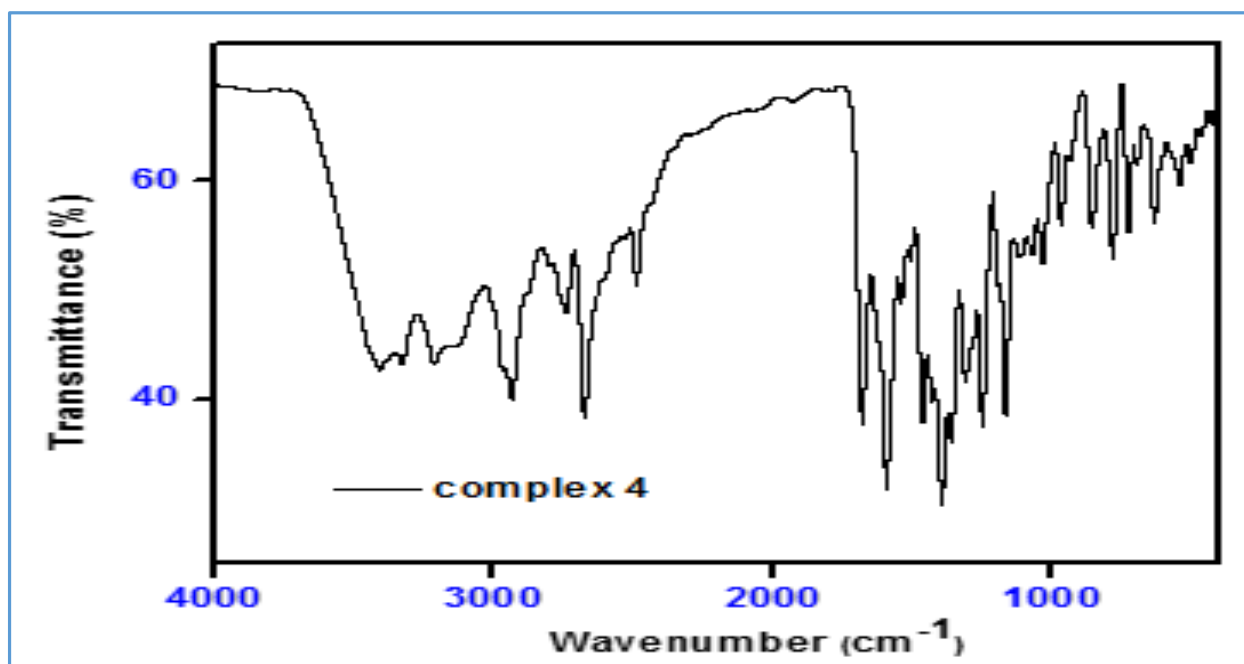

Figure S4: FT-IR spectrum of complex 4.

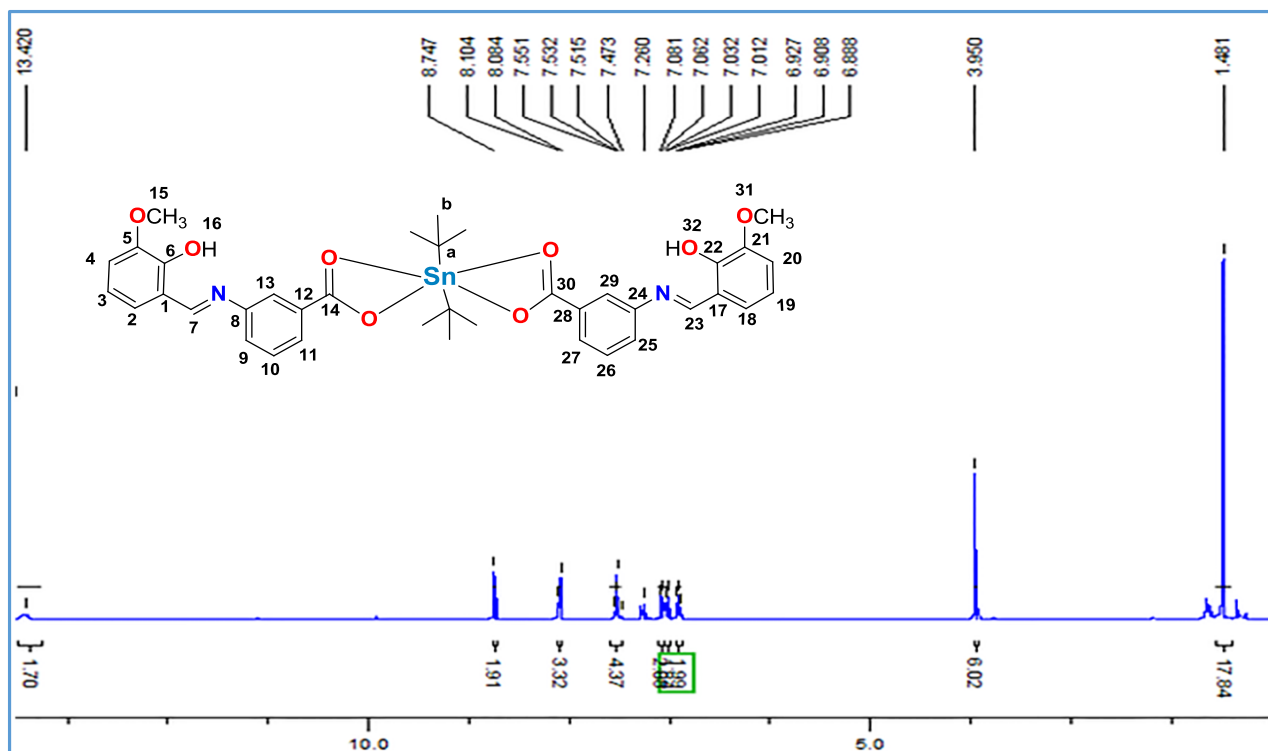

**Figure S5:**  $^1\text{H}$  NMR spectrum of complex **1** recorded in  $\text{CDCl}_3$ .

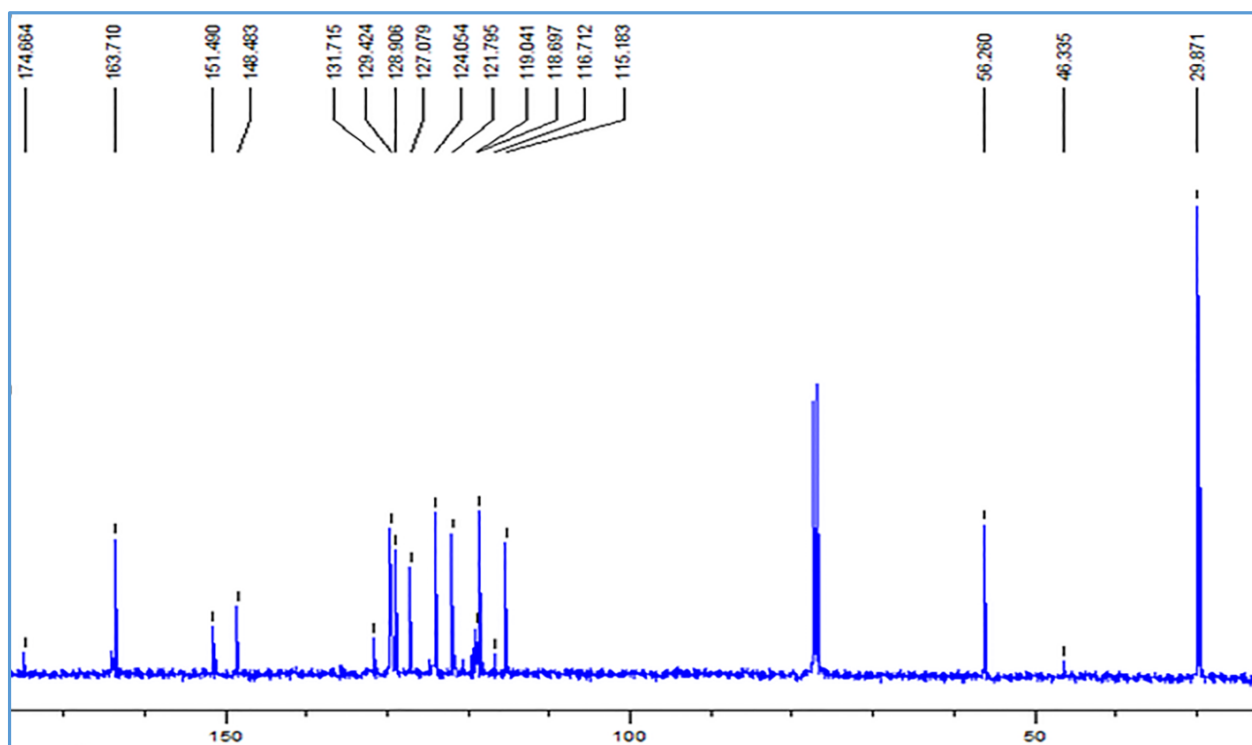

**Figure S6:**  $^{13}\text{C}\{^1\text{H}\}$  NMR spectrum of complex **1** recorded in  $\text{CDCl}_3$ .

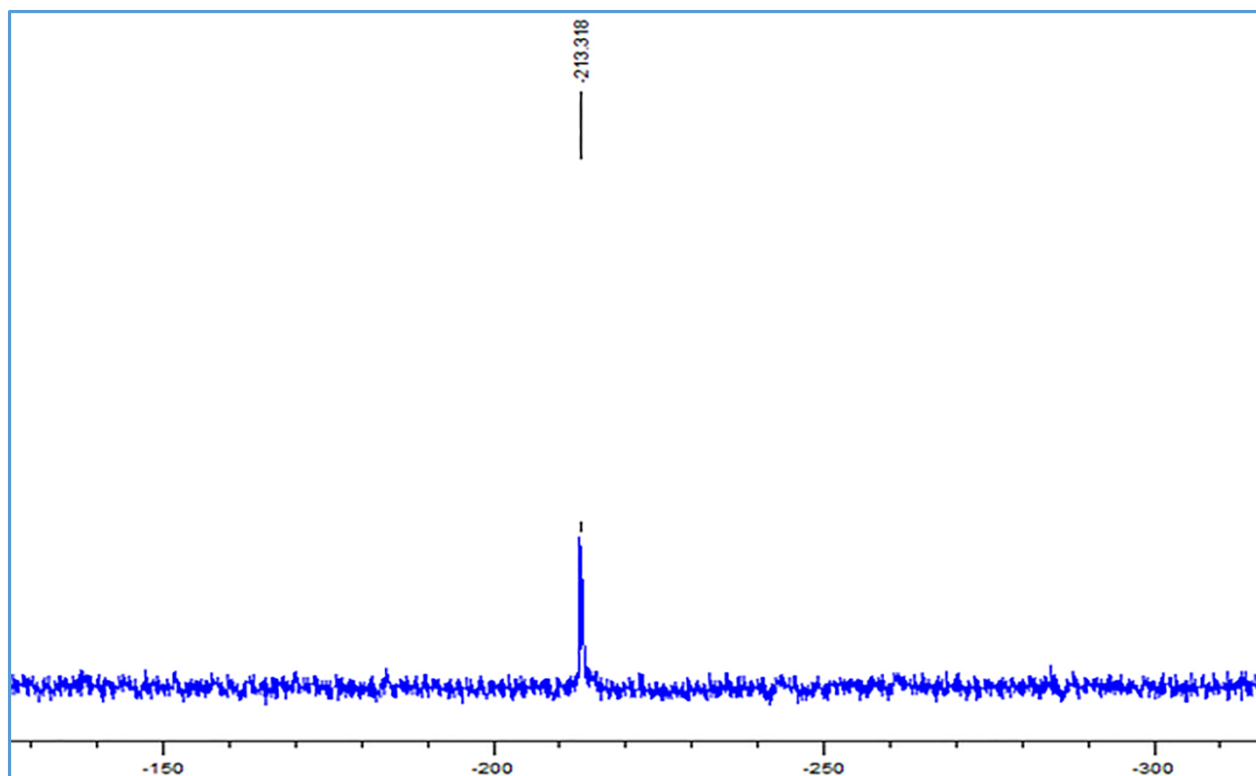

**Figure S7:**  $^{119}\text{Sn}$  NMR spectrum of complex **1** recorded in  $\text{CDCl}_3$

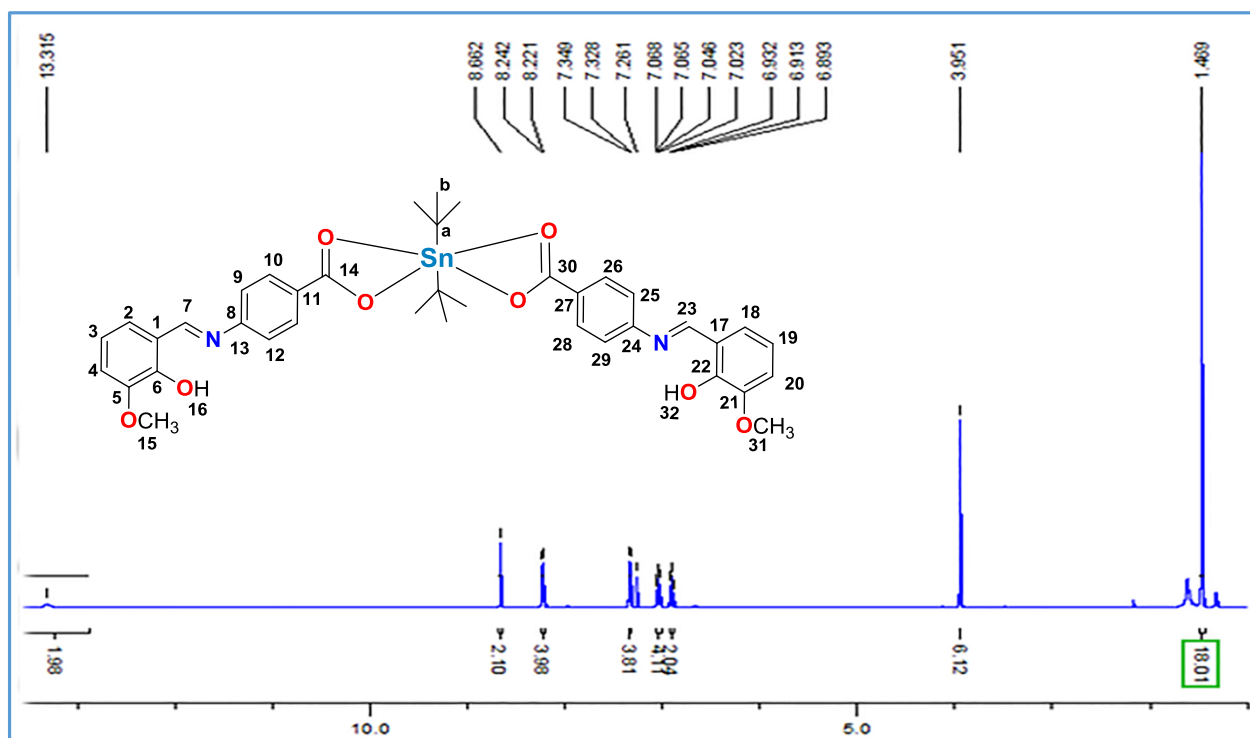

**Figure S8:**  $^1\text{H}$  NMR spectrum of complex **2** recorded in  $\text{CDCl}_3$ .

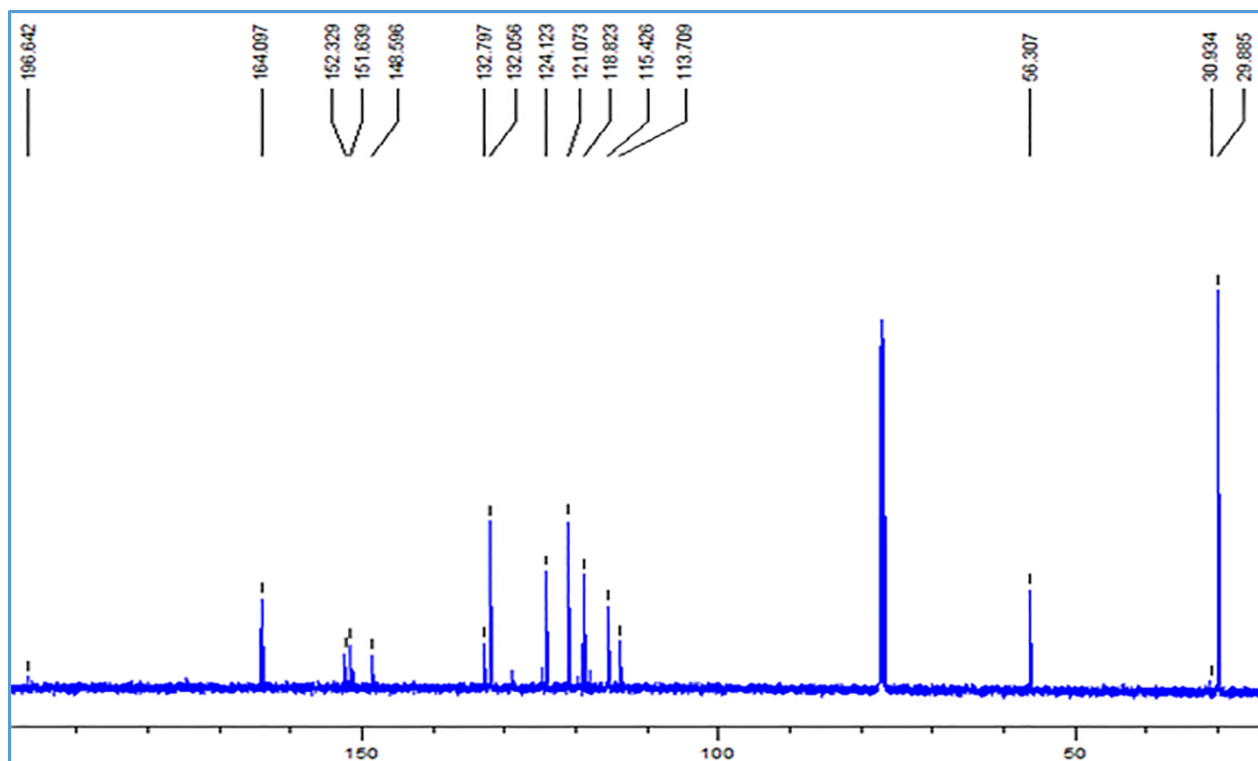

**Figure S9:**  $^{13}\text{C}\{^1\text{H}\}$  NMR spectrum of complex **2** recorded in  $\text{CDCl}_3$ .

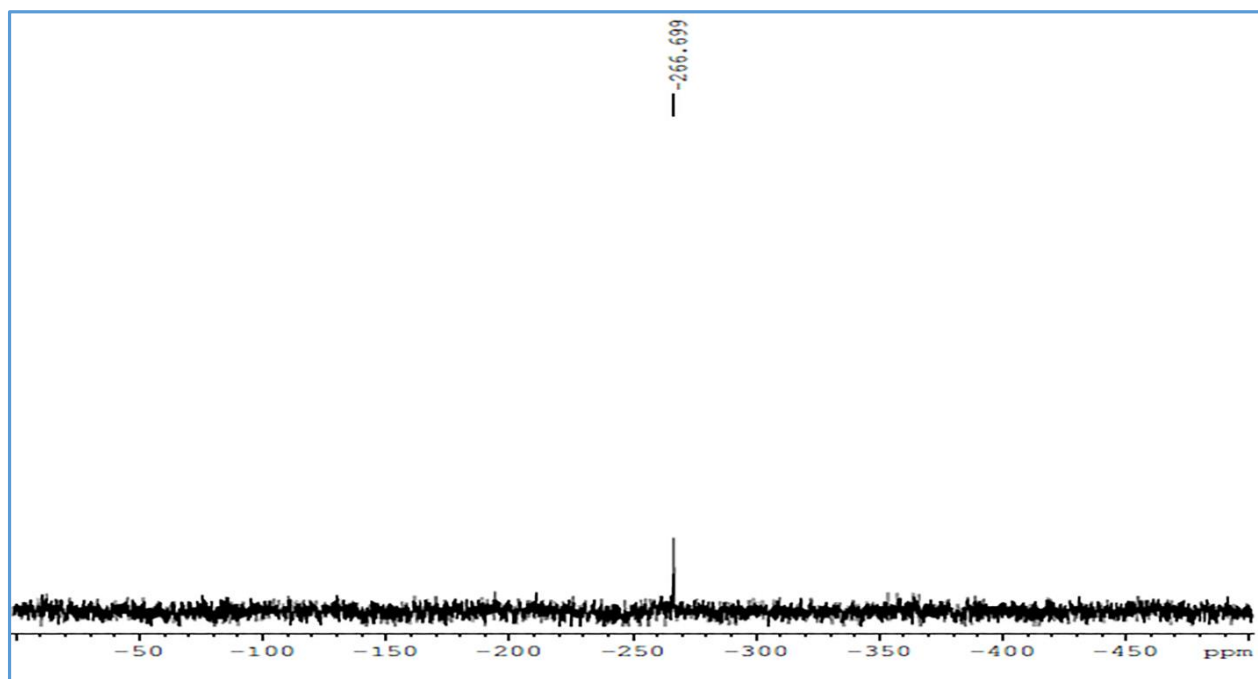

**Figure S10:**  $^{119}\text{Sn}$  NMR spectrum of complex **2** recorded in  $\text{CDCl}_3$ .



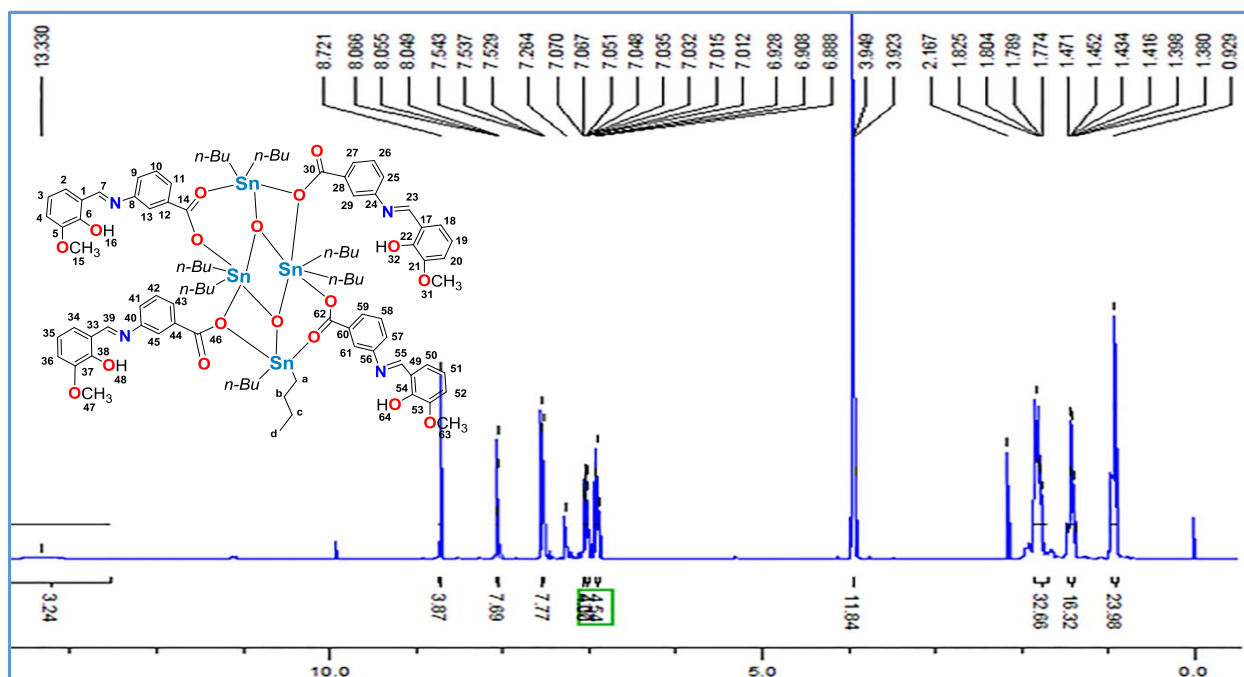

Figure S11:  $^1\text{H}$  NMR spectrum of complex 3 recorded in  $\text{CDCl}_3$ .

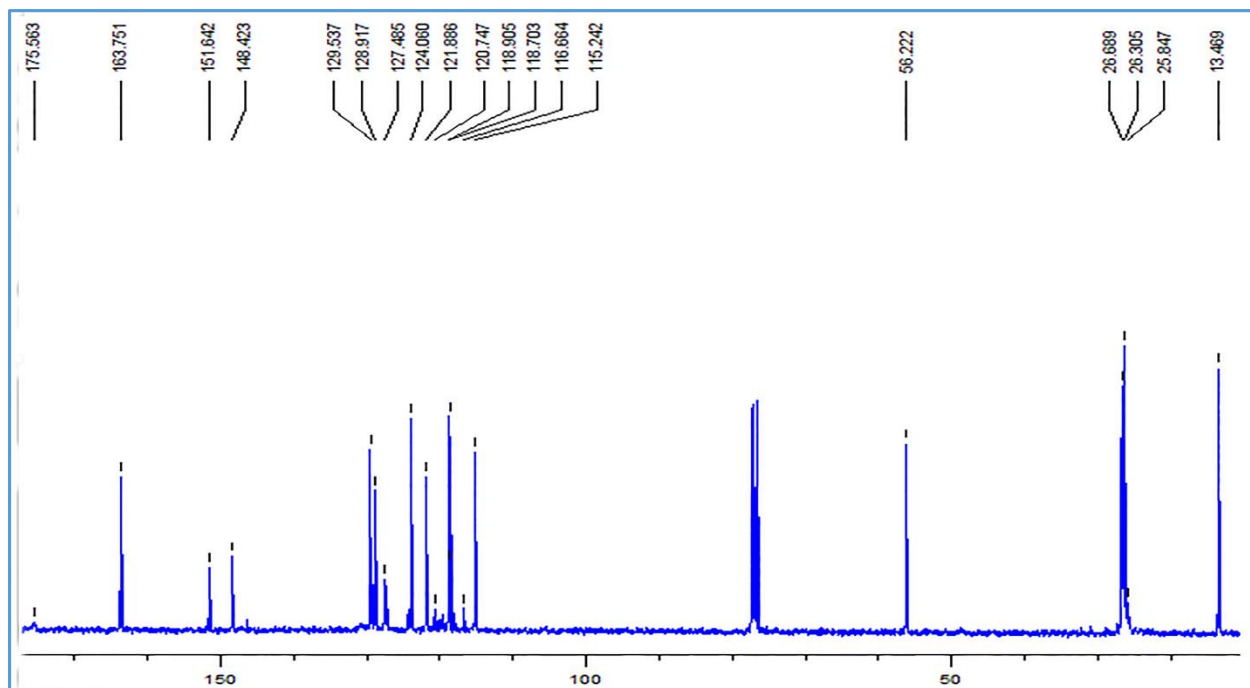

Figure S12:  $^{13}\text{C}\{^1\text{H}\}$  NMR spectrum of complex 3 recorded in  $\text{CDCl}_3$ .

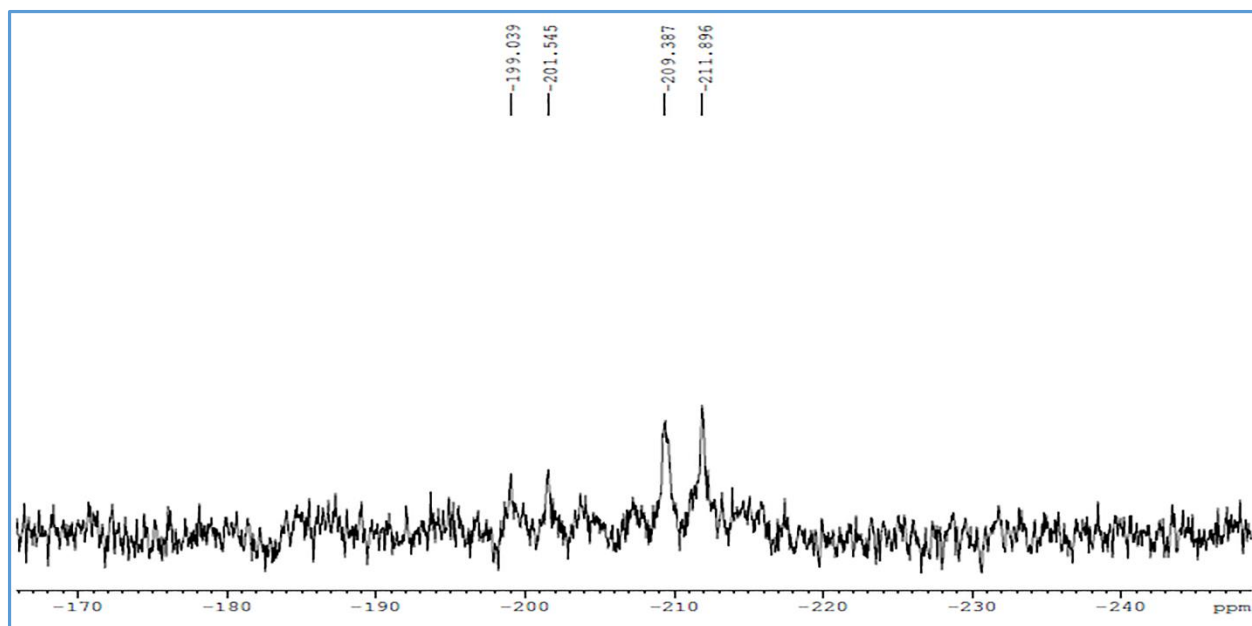

**Figure S13:**  $^{119}\text{Sn}$  NMR spectrum of complex **3** recorded in  $\text{CDCl}_3$

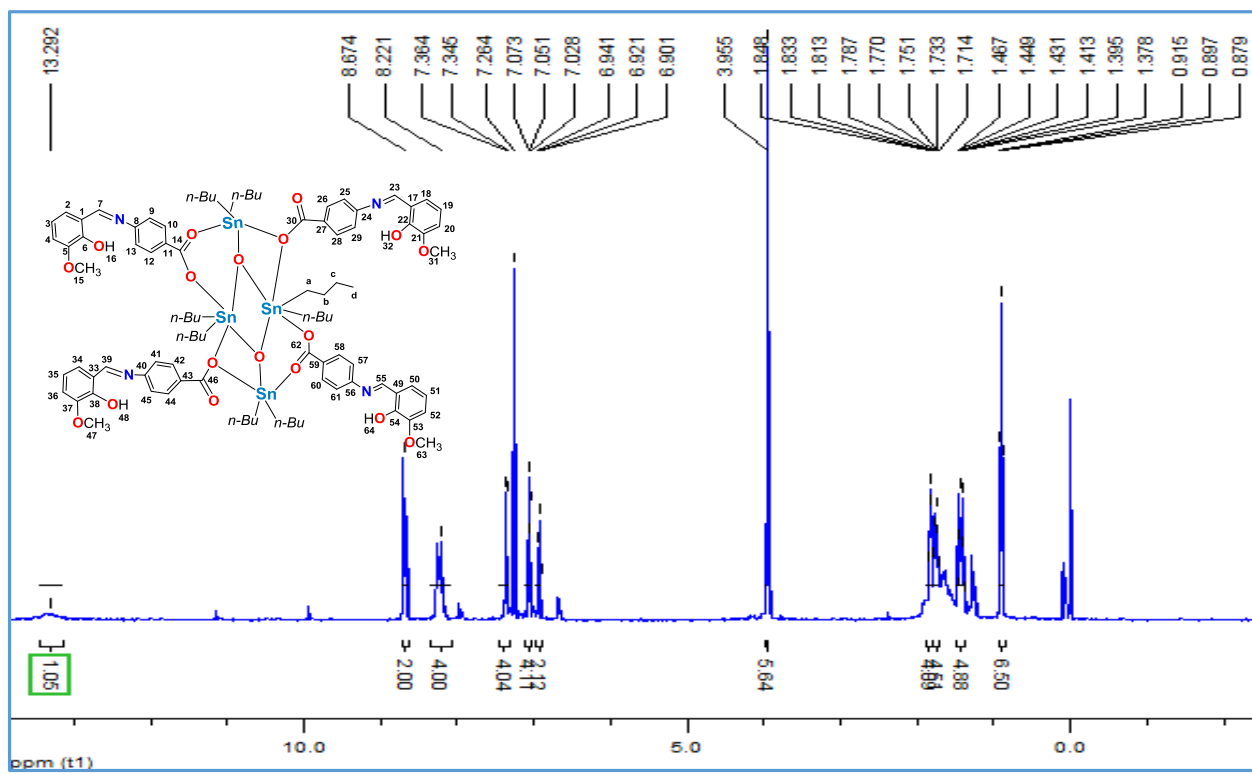

**Figure S14:**  $^1\text{H}$  NMR spectrum of complex **4** recorded in  $\text{CDCl}_3$ .

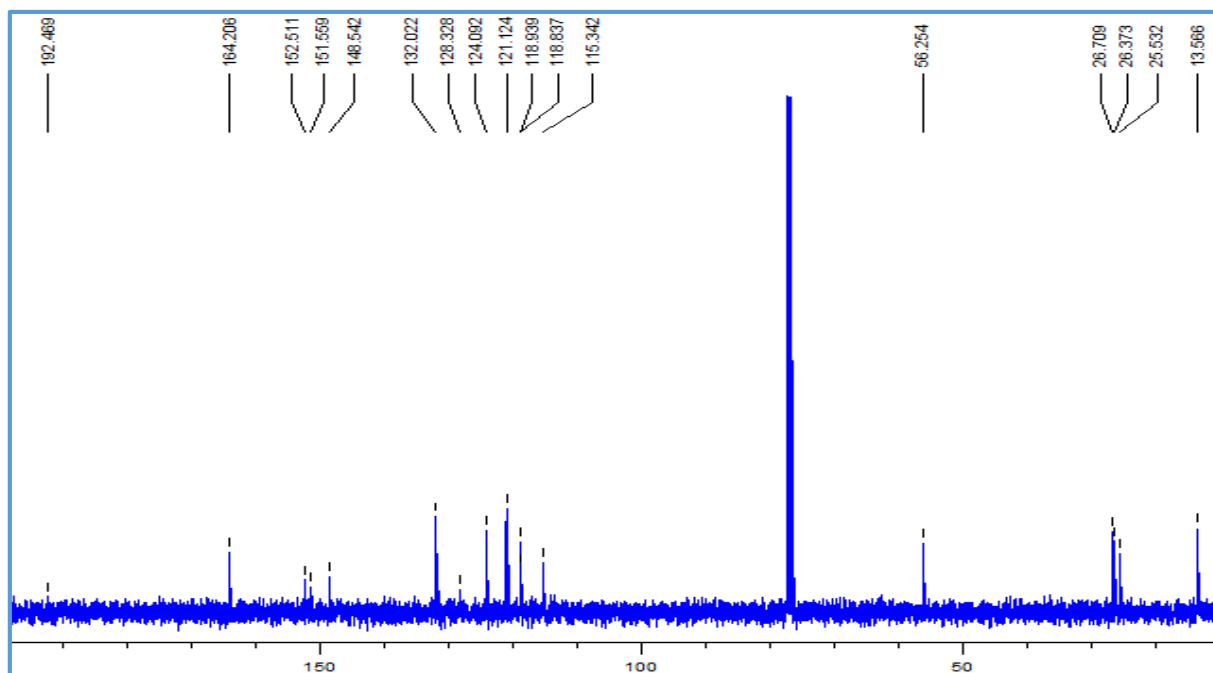

**Figure S15:**  $^{13}\text{C}\{^1\text{H}\}$  NMR spectrum of complex **4** recorded in  $\text{CDCl}_3$ .

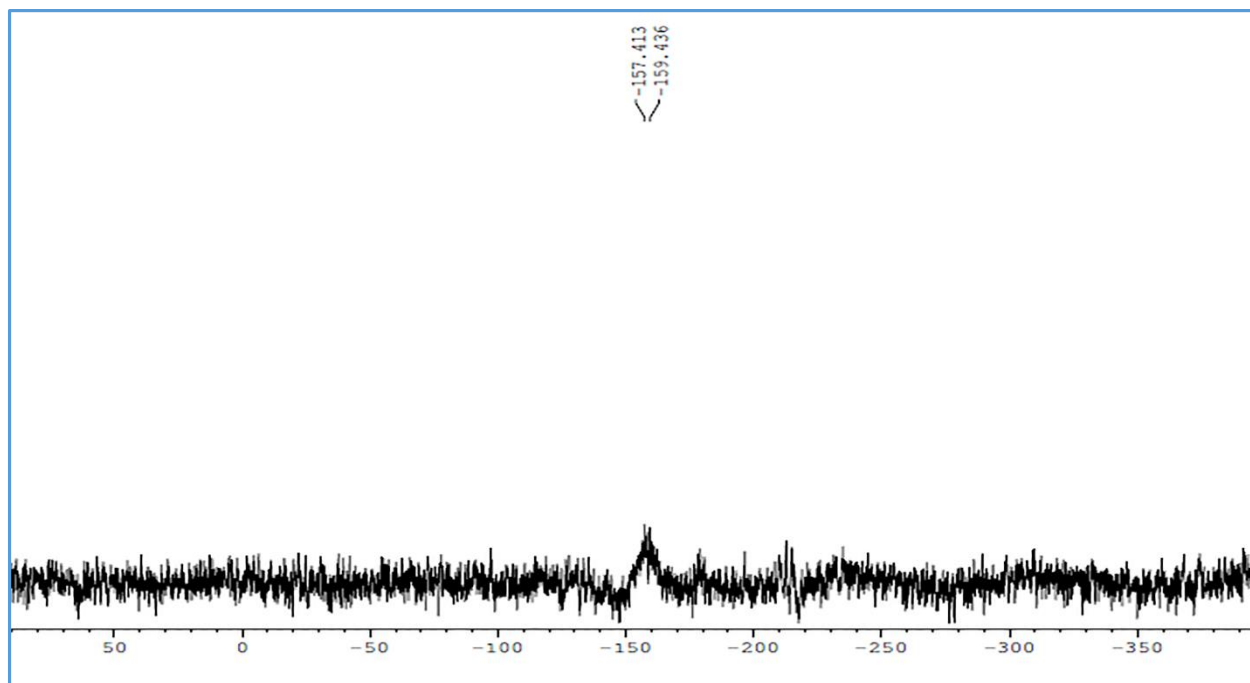

**Figure S16:**  $^{119}\text{Sn}$  NMR spectrum of complex **4** recorded in  $\text{CDCl}_3$

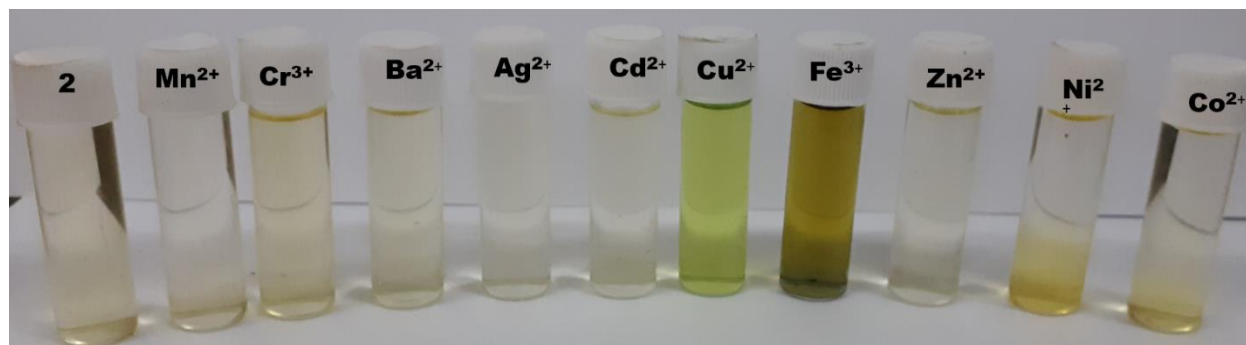

**Figure S17:** Naked-eye color changes observed due to the addition of equivalent amounts of metal salts in complex 2.

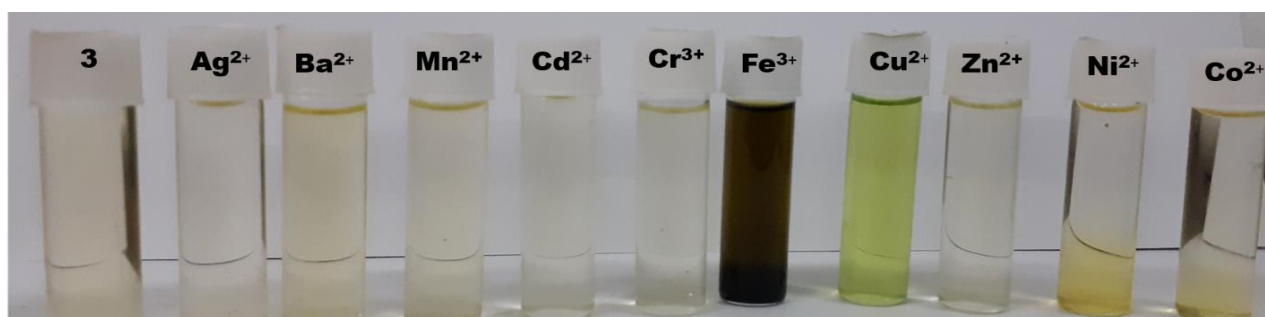

**Figure S18:** Naked-eye color changes observed due to the addition of equivalent amounts of metal salts in complex 3.

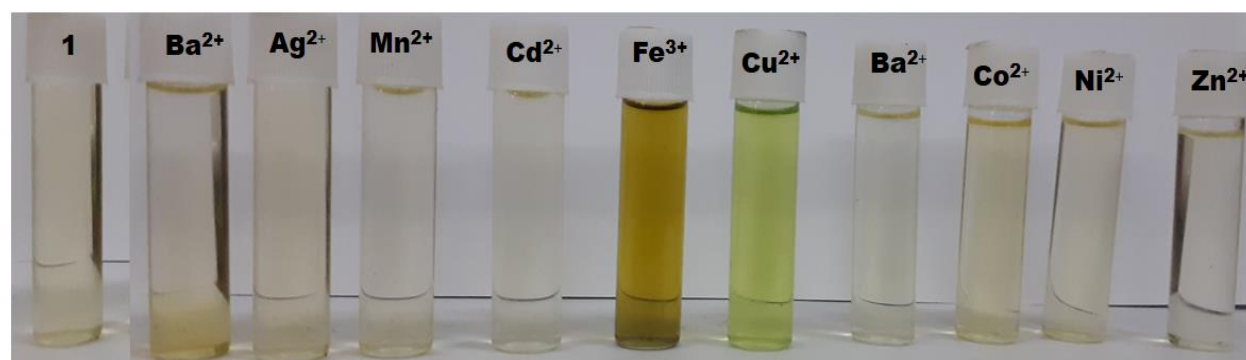

**Figure S19:** Naked-eye color changes observed due to the addition of equivalent amounts of metal salts in complex 4.

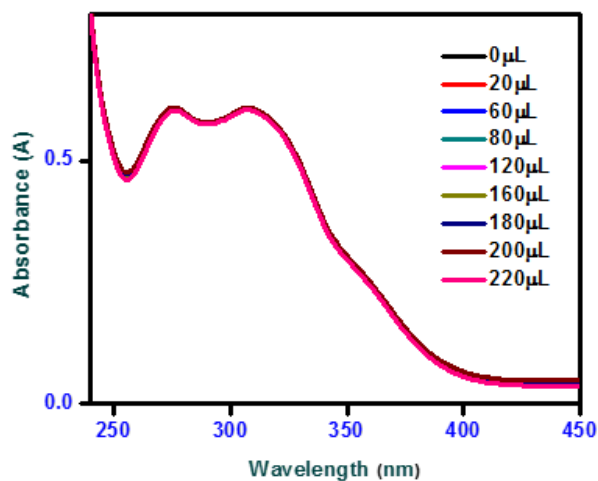

(a)

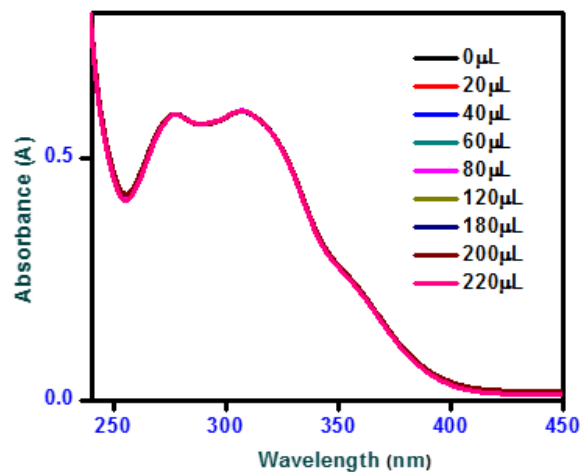

(b)

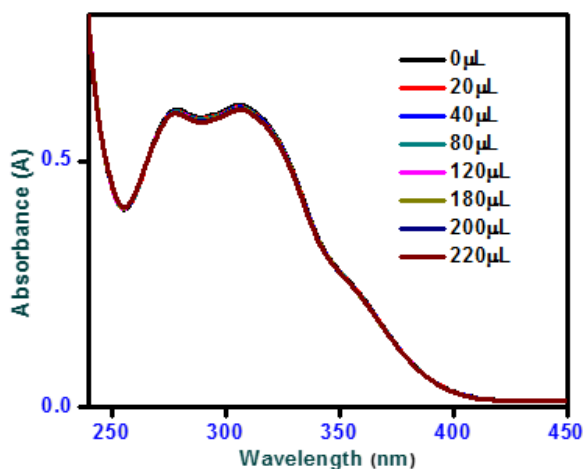

(c)

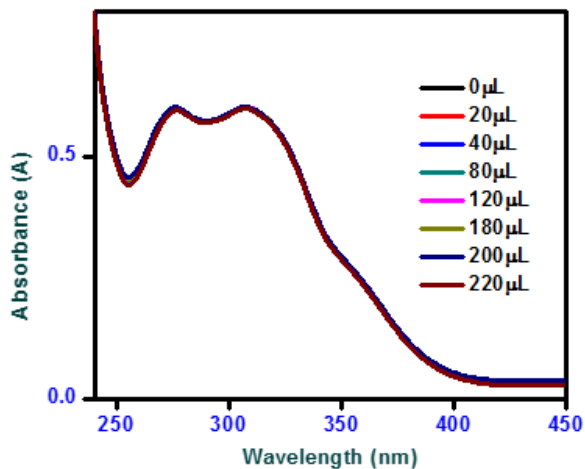

(d)

**Figure S20:** Absorption spectral variation of complex **1** ( $2 \times 10^{-5} \text{ mol dm}^{-3}$ ) with the addition of 1-5 equivalent of nitrate salts ( $2 \times 10^{-4} \text{ mol dm}^{-3}$ ) of (a)  $\text{Ag}^+$  (b)  $\text{Ba}^{2+}$  (c)  $\text{Cd}^{2+}$  (d)  $\text{Co}^{2+}$  in DCM-methanol (1:9).

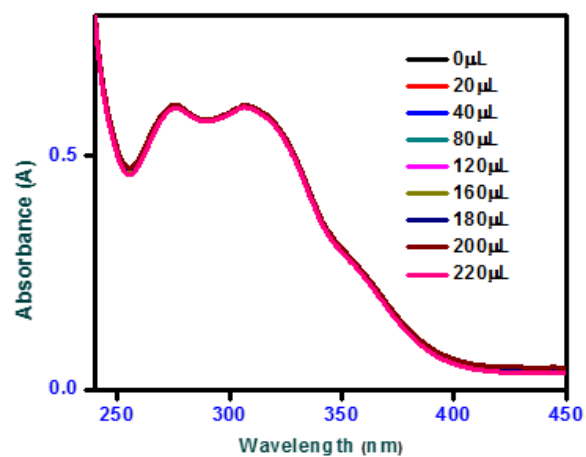

(e)

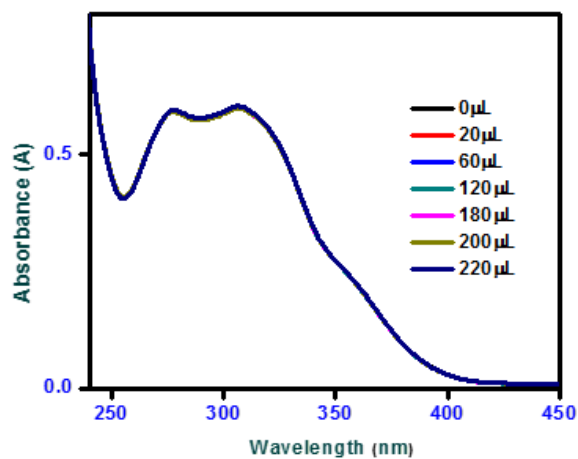

(f)

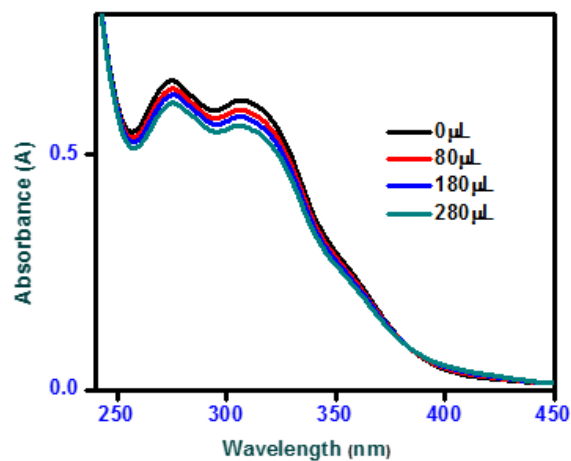

(g)

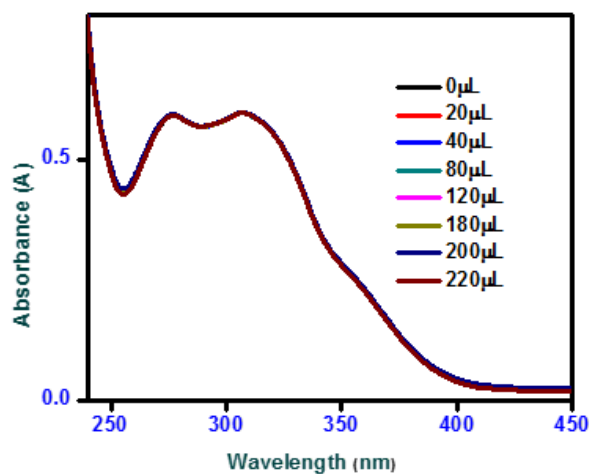

(h)

**Figure S21:** Absorption spectral variation of complex **1** ( $2 \times 10^{-5} \text{ mol dm}^{-3}$ ) with the addition of 1-5 equivalent of nitrate salts ( $2 \times 10^{-4} \text{ mol dm}^{-3}$ ) of (e)  $\text{Cr}^{3+}$  (f)  $\text{Mn}^{2+}$  (g)  $\text{Ni}^{2+}$  (h)  $\text{Zn}^{2+}$  in DCM-methanol (1:9).

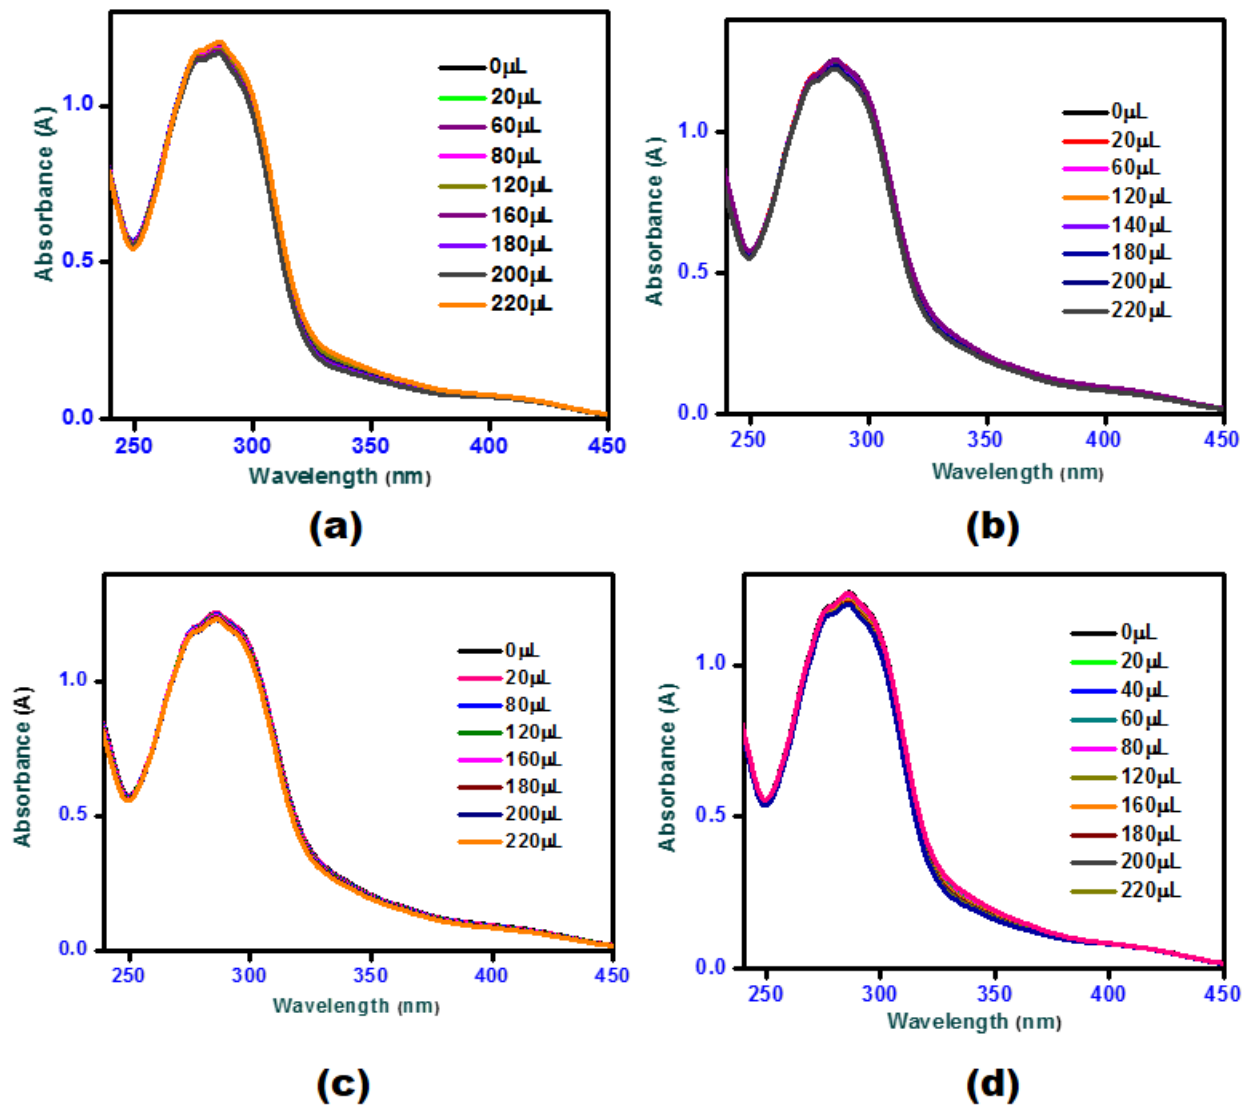

**Figure S22:** Absorption spectral variation of complex 2 ( $2 \times 10^{-5} \text{ mol dm}^{-3}$ ) with the addition of 1-5 equivalent of nitrate salts ( $2 \times 10^{-4} \text{ mol dm}^{-3}$ ) of (a)  $\text{Ag}^+$  (b)  $\text{Ba}^{2+}$  (c)  $\text{Cd}^{2+}$  (d)  $\text{Co}^{2+}$  in DCM-methanol (1:9).

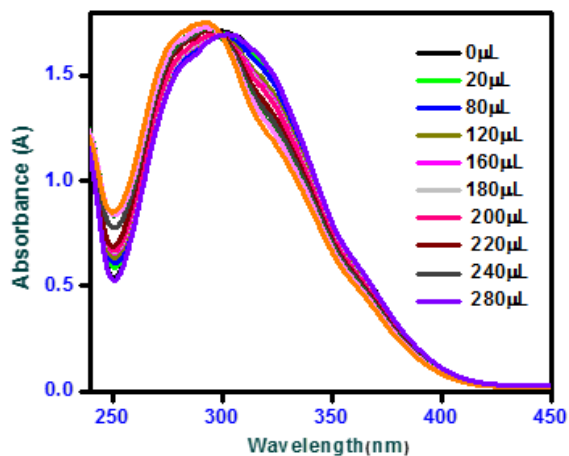

(e)

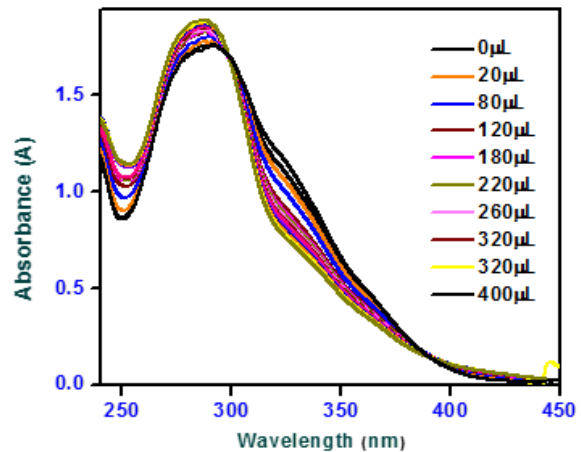

(f)

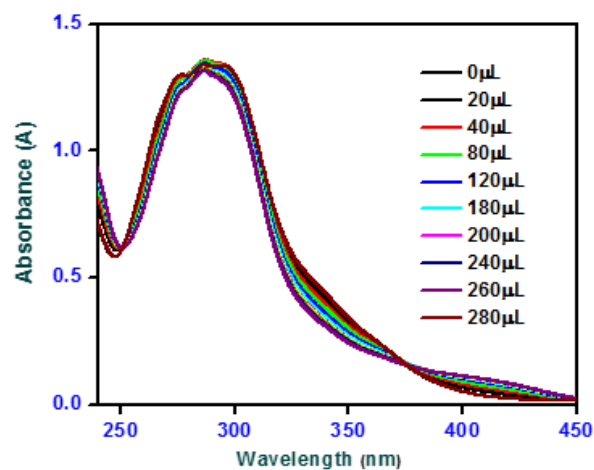

(g)

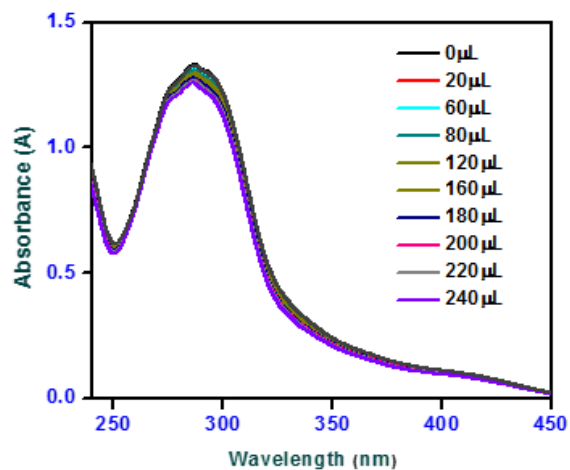

(h)

**Figure S23:** Absorption spectral variation of complex **2** ( $2 \times 10^{-5} \text{ mol dm}^{-3}$ ) with the addition of 1-5 equivalent of nitrate salts ( $2 \times 10^{-4} \text{ mol dm}^{-3}$ ) of (e)  $\text{Cr}^{3+}$  (f)  $\text{Mn}^{2+}$  (g)  $\text{Ni}^{2+}$  (h)  $\text{Zn}^{2+}$  in DCM-methanol (1:9).



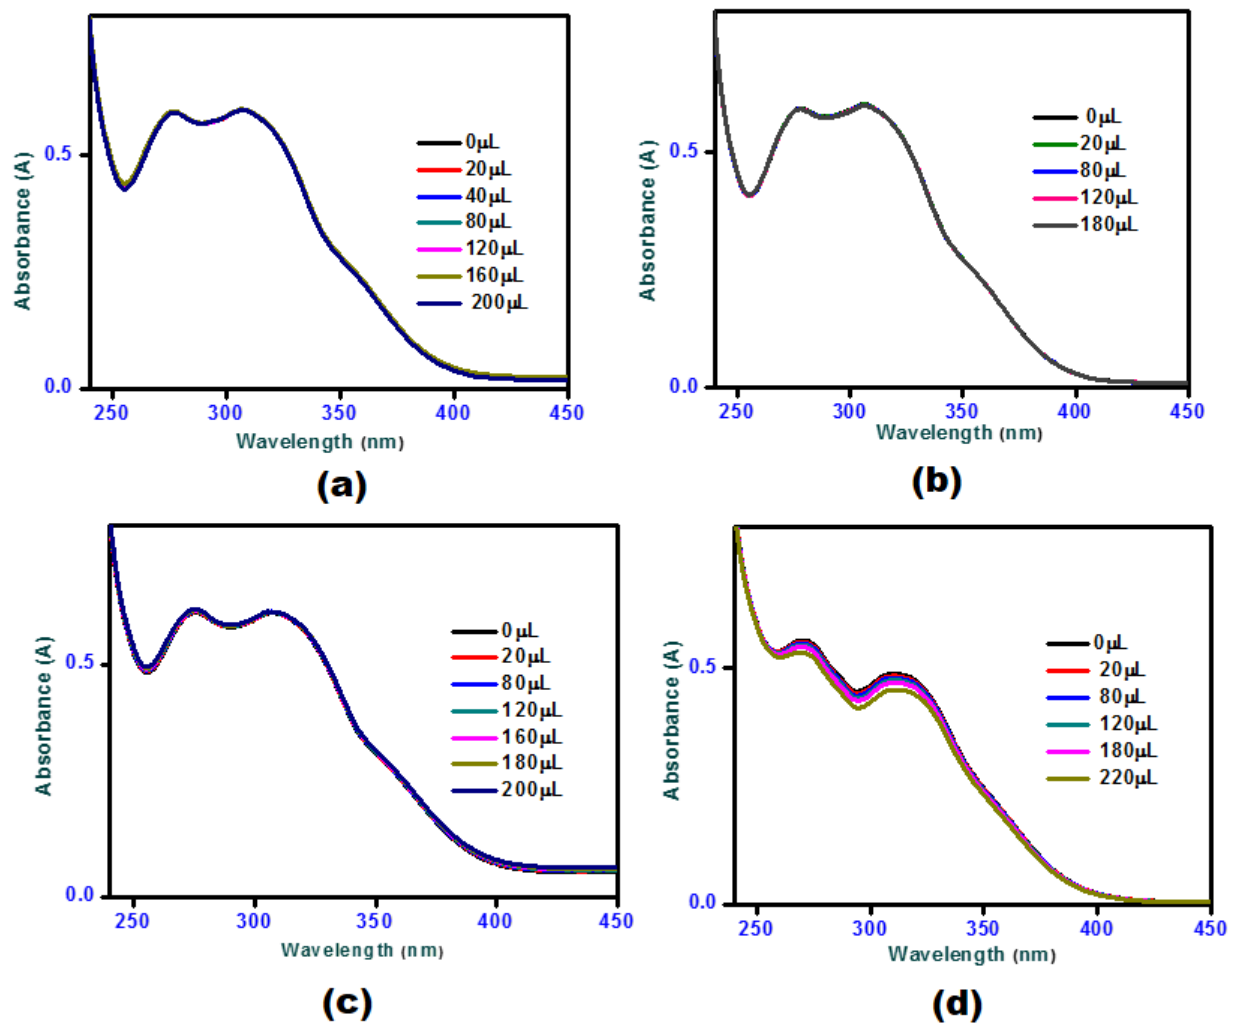

**Figure S24:** Absorption spectral variation of complex **3** ( $2 \times 10^{-5} \text{ mol dm}^{-3}$ ) with the addition of 1-5 equivalent of nitrate salts ( $2 \times 10^{-4} \text{ mol dm}^{-3}$ ) of (a) Ag<sup>+</sup> (b) Ba<sup>2+</sup> (c) Cd<sup>2+</sup> (d) Co<sup>2+</sup> in DCM-methanol(1:9).

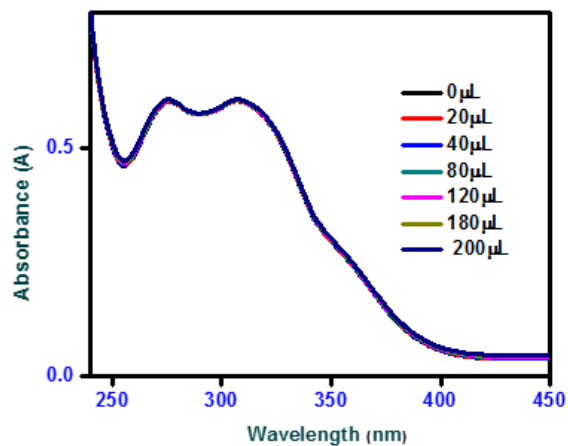

(e)

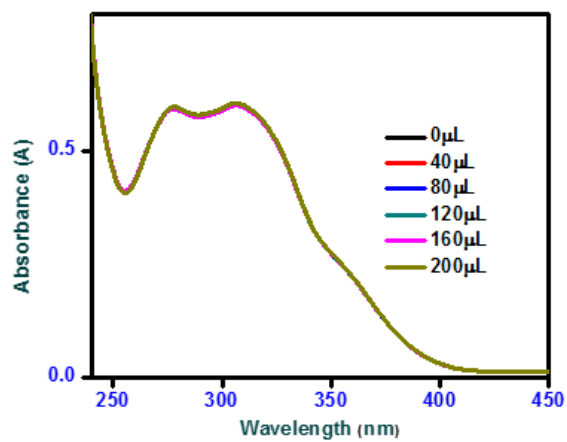

(f)

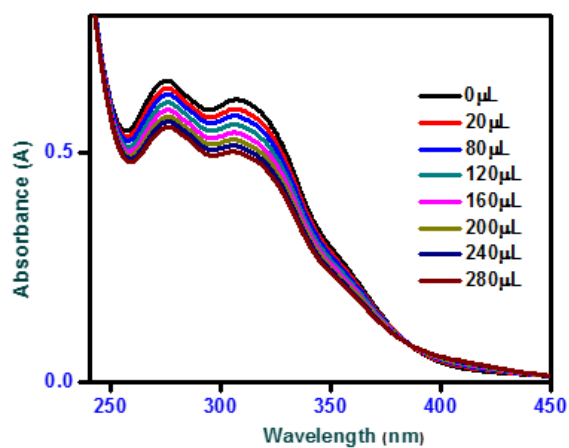

(g)

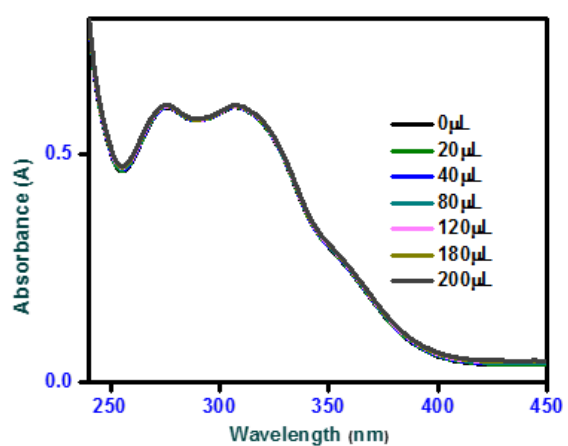

(h)

**Figure S25:** Absorption spectral variation of complex **3** ( $2 \times 10^{-5} \text{ mol dm}^{-3}$ ) with the addition of 1-5 equivalent of nitrate salts ( $2 \times 10^{-4} \text{ mol dm}^{-3}$ ) of (e)  $\text{Cr}^{3+}$  (f)  $\text{Mn}^{2+}$  (g)  $\text{Ni}^{2+}$  (h)  $\text{Zn}^{2+}$  in DCM-methanol (1:9).

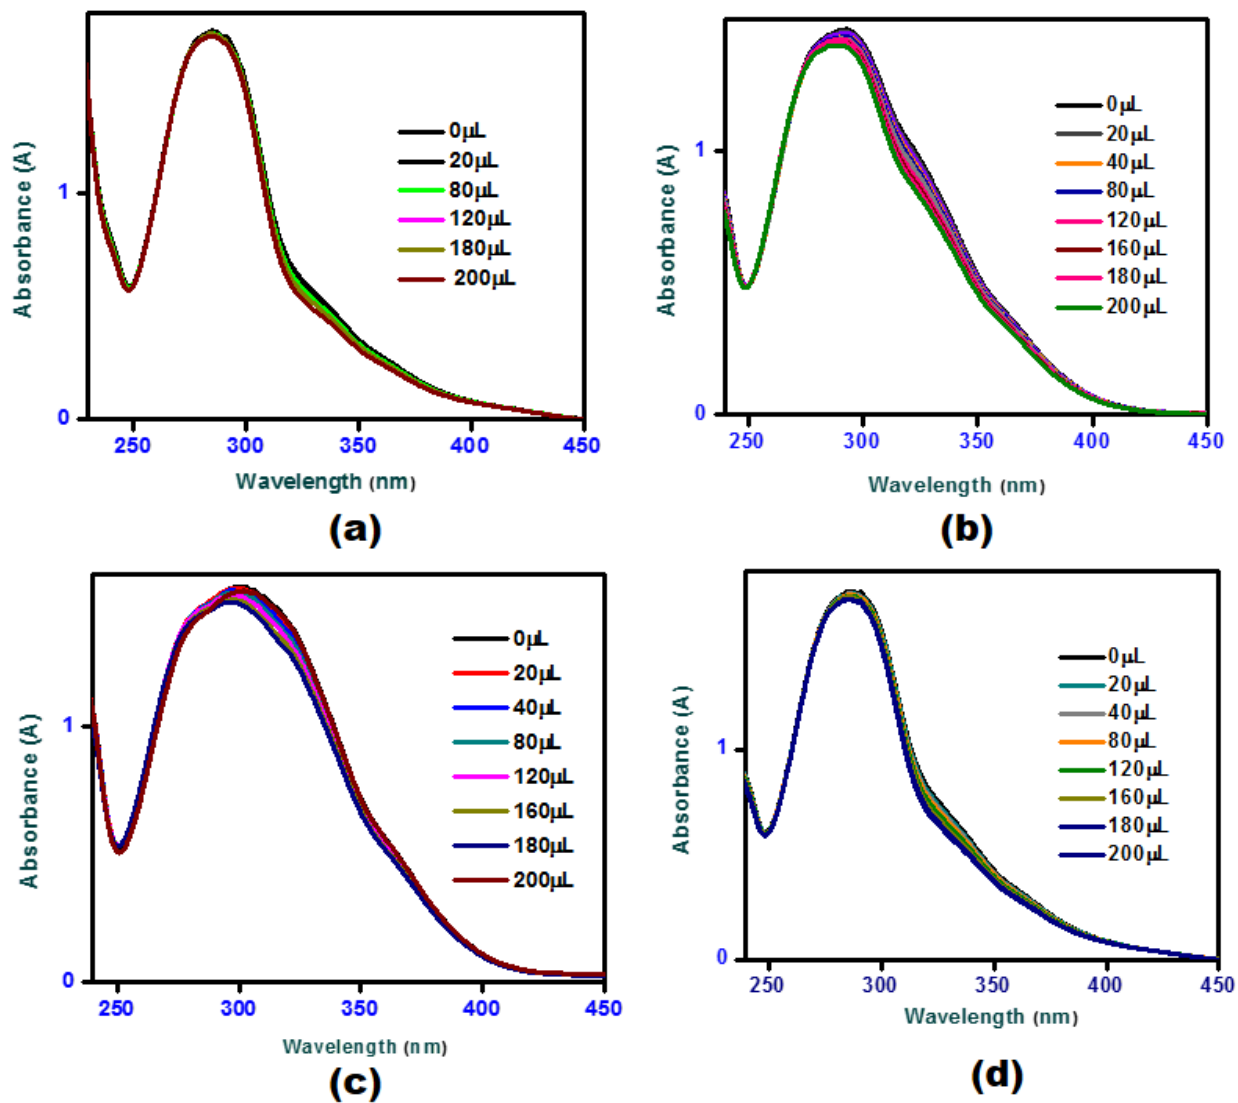

**Figure S26:** Absorption spectral variation of complex 4 ( $2 \times 10^{-5} \text{ mol dm}^{-3}$ ) with the addition of 1-5 equivalent of nitrate salts ( $2 \times 10^{-4} \text{ mol dm}^{-3}$ ) of (a)  $\text{Ag}^+$  (b)  $\text{Ba}^{2+}$  (c)  $\text{Cd}^{2+}$  (d)  $\text{Co}^{2+}$  in DCM-methanol (1:9).

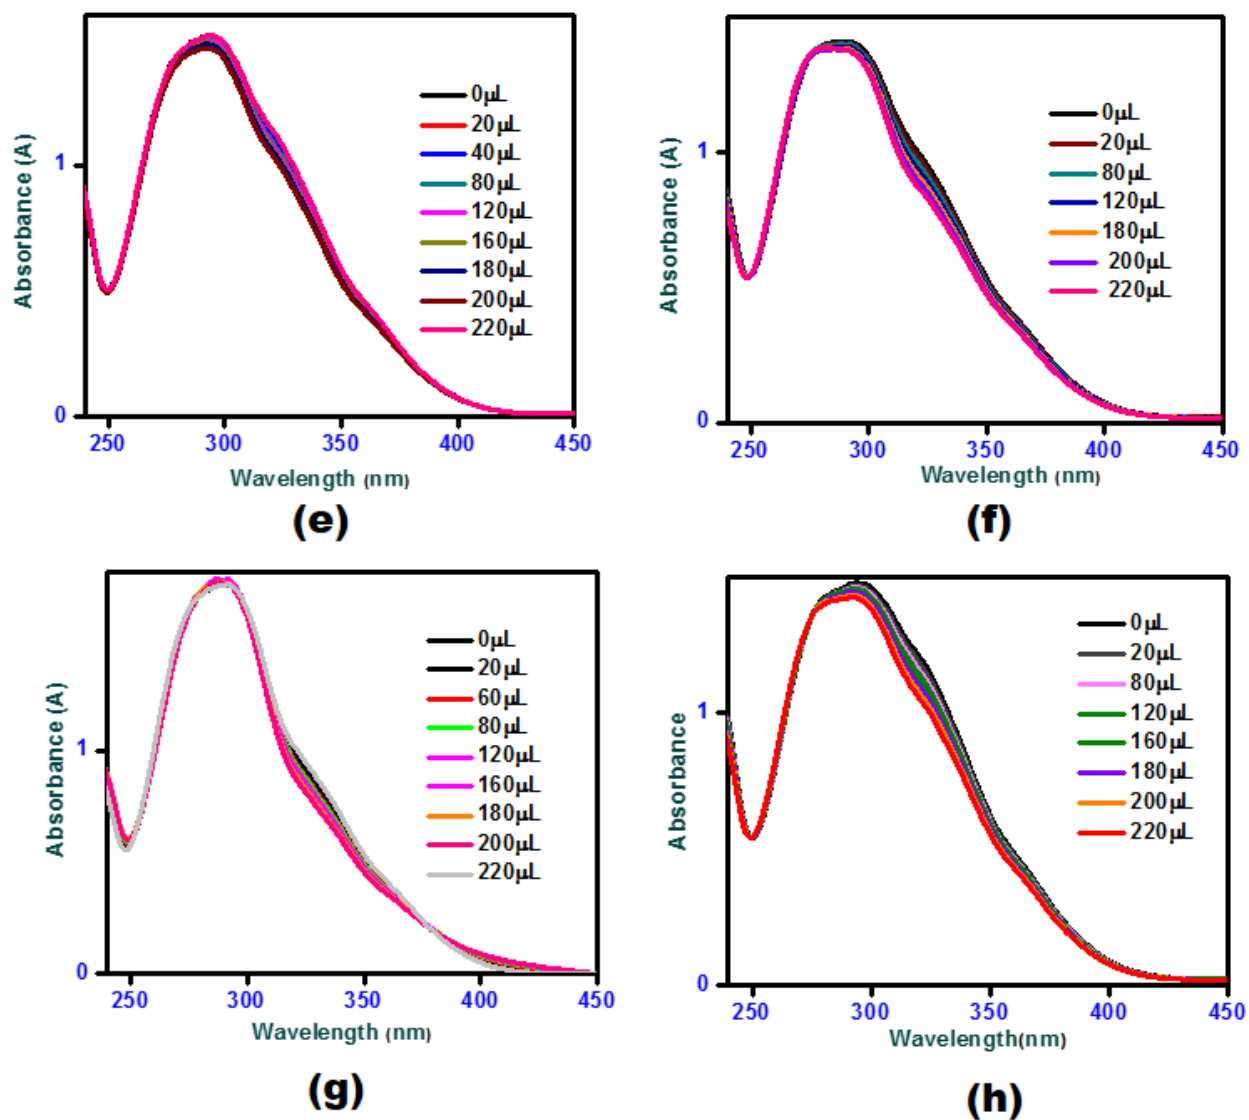

**Figure S27:** Absorption spectral variation of complex 4 ( $2 \times 10^{-5} \text{ mol dm}^{-3}$ ) with the addition of 1-5 equivalent of nitrate salts ( $2 \times 10^{-4} \text{ mol dm}^{-3}$ ) of (e)  $\text{Cr}^{3+}$  (f)  $\text{Mn}^{2+}$  (g)  $\text{Ni}^{2+}$  (h)  $\text{Zn}^{2+}$  in DCM-methanol (1:9).

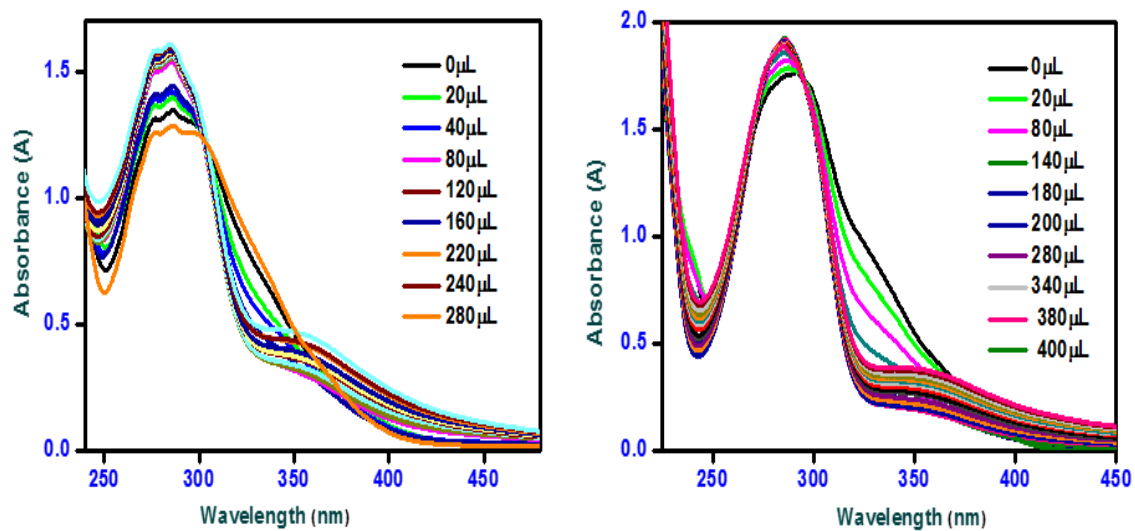

**Figure S28:** Absorption spectral variation of complex **2** and **4** ( $2 \times 10^{-5} \text{ mol dm}^{-3}$ ) with the addition of 1-5 equivalent of ferric nitrate nonahydrate ( $2 \times 10^{-4} \text{ mol dm}^{-3}$ ) in DCM-methanol (1:9).

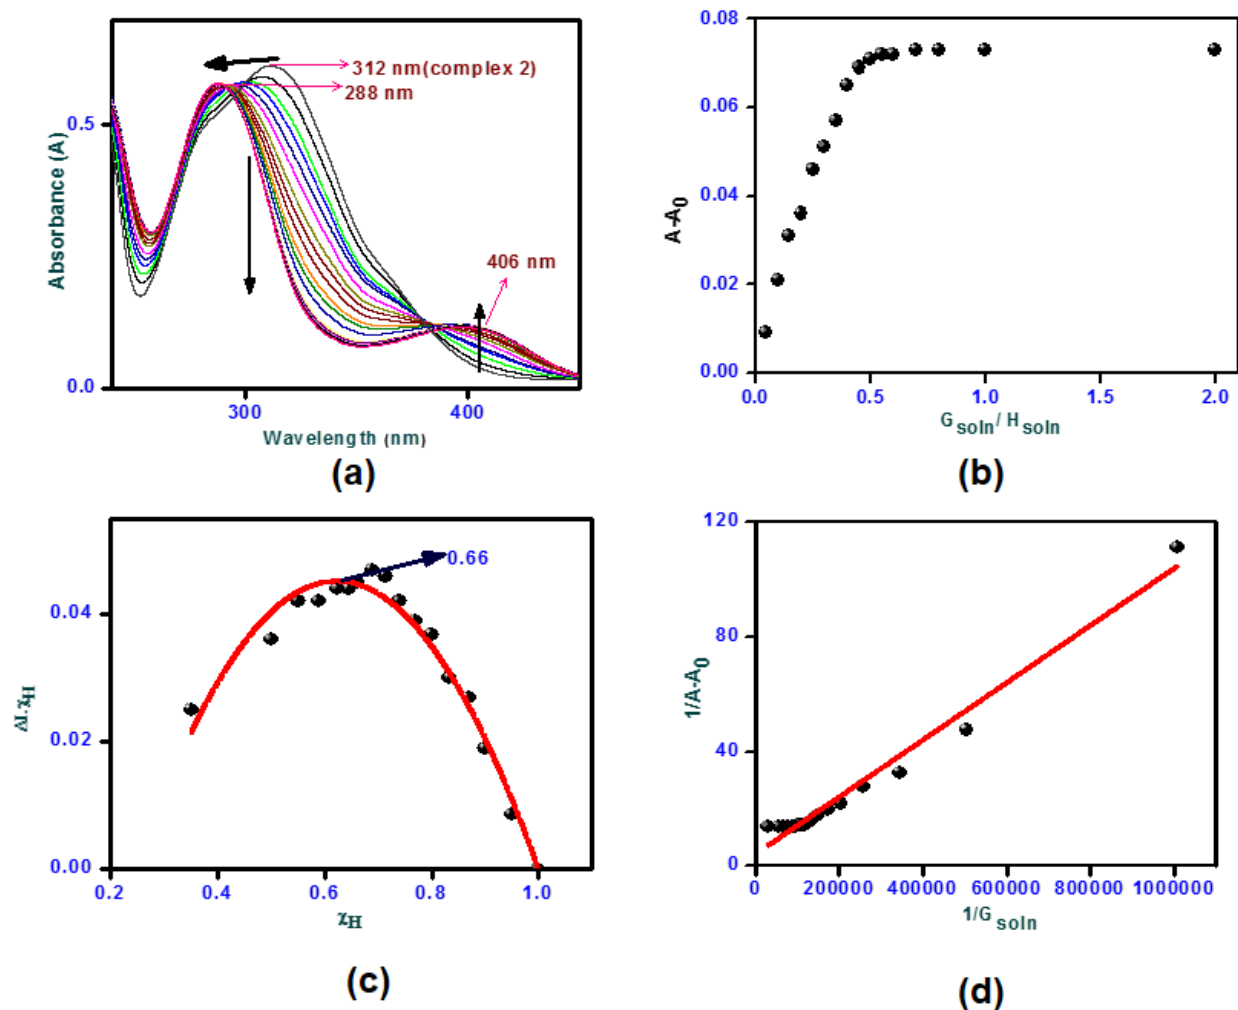

**Figure S29:** (a) Absorption spectral variation of complex **2** ( $2 \times 10^{-5} \text{ mol dm}^{-3}$ ) with the addition of 1-5 equivalent of copper(II) nitrate trihydrate ( $2 \times 10^{-4} \text{ mol dm}^{-3}$ ) in DCM-methanol (1:9). (b) The stoichiometric plot of complex **2** with copper(II) nitrate trihydrate. (c) Job's plot of Complex **2** with copper(II) nitrate trihydrate. (d) Benesi-Hildebrand plot complex **2** with the addition of copper(II) nitrate trihydrate.

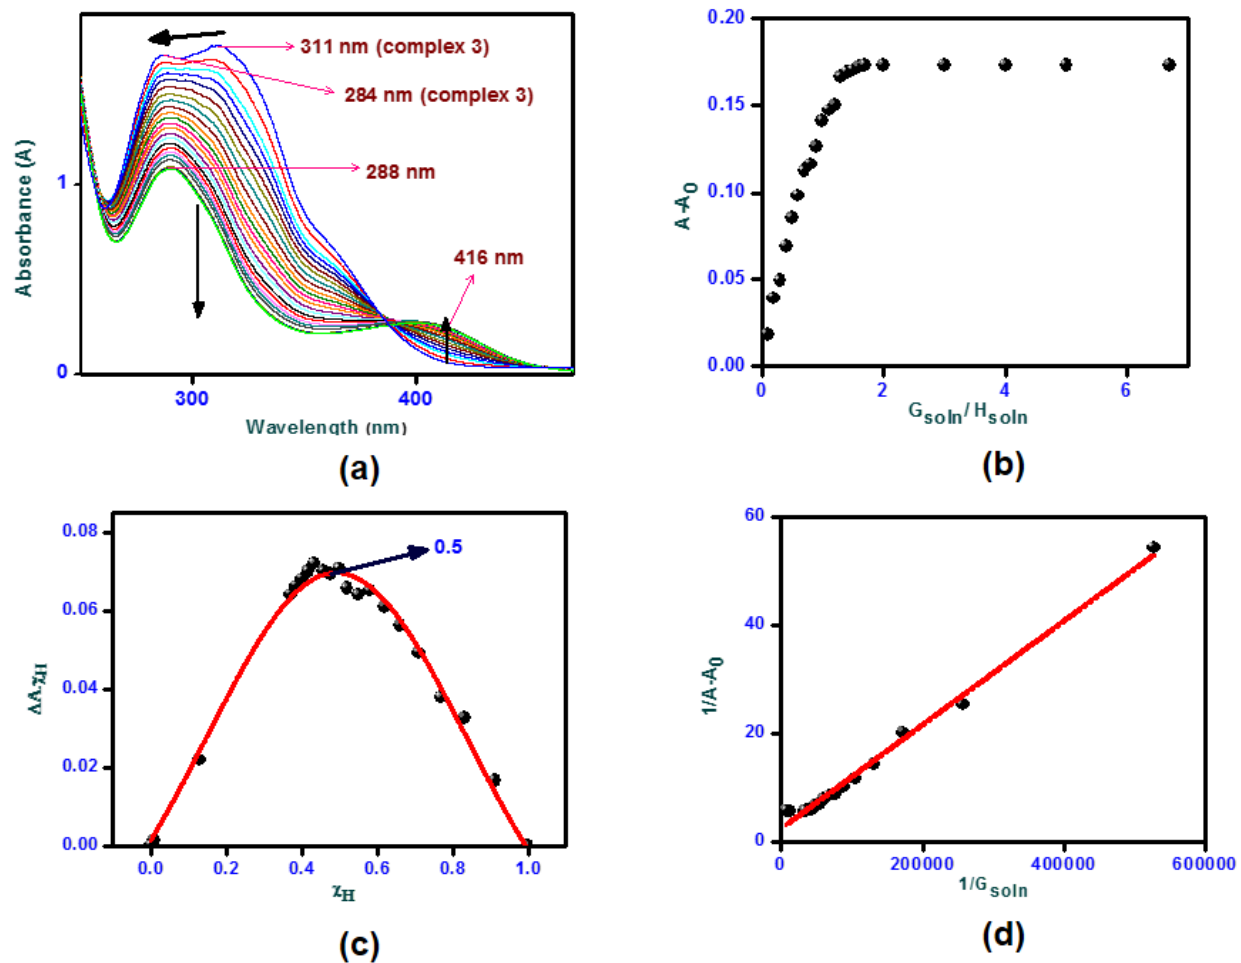

**Figure S30:** (a) Absorption spectral variation of complex **3** ( $2 \times 10^{-5} \text{ mol dm}^{-3}$ ) with the addition of 1-5 equivalent of copper nitrate trihydrate ( $2 \times 10^{-4} \text{ mol dm}^{-3}$ ) in DCM-methanol (1:9). (b) The stoichiometric plot of complex **3** with copper(II) nitrate trihydrate. (c) Job's plot of Complex **3** with copper(II) nitrate trihydrate. (d) Benesi-Hildebrand plot complex **3** with the addition of copper(II) nitrate trihydrate.

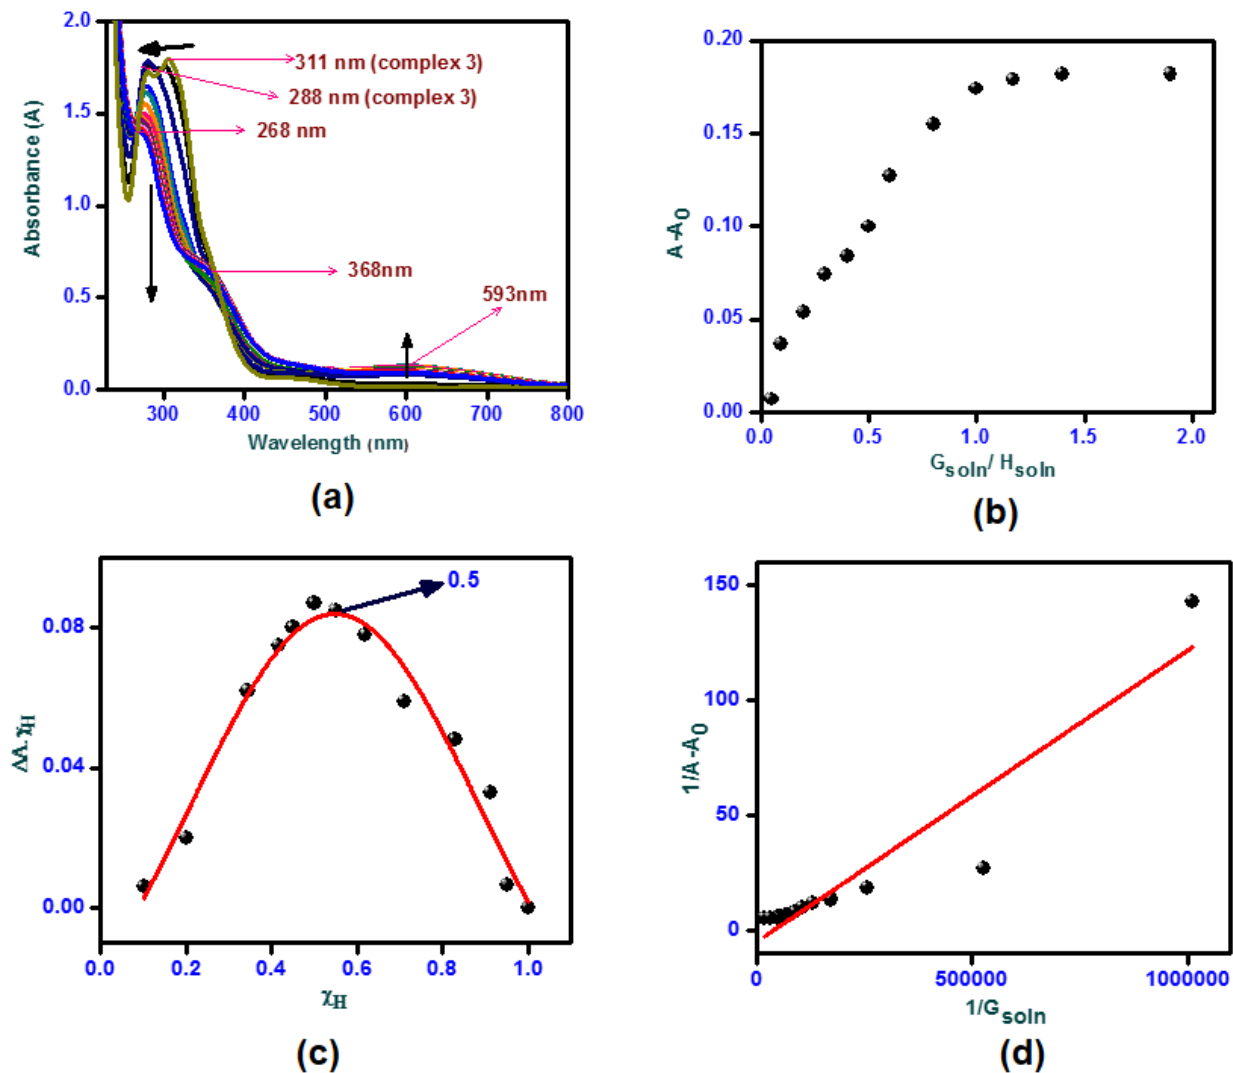

**Figure S31:** (a) Absorption spectral variation of complex **3** ( $2 \times 10^{-5} \text{ mol dm}^{-3}$ ) with the addition of 1-3 equivalent of ferric nitrate nonahydrate ( $2 \times 10^{-4} \text{ mol dm}^{-3}$ ) in DCM-methanol (1:9). (b) The stoichiometric plot of Complex **3** with ferric nitrate nonahydrate. (c) Job's plot of Complex **3** with ferric nitrate nonahydrate. (d) Benesi-Hildebrand plot complex **3** with the addition of ferric nitrate nonahydrate.



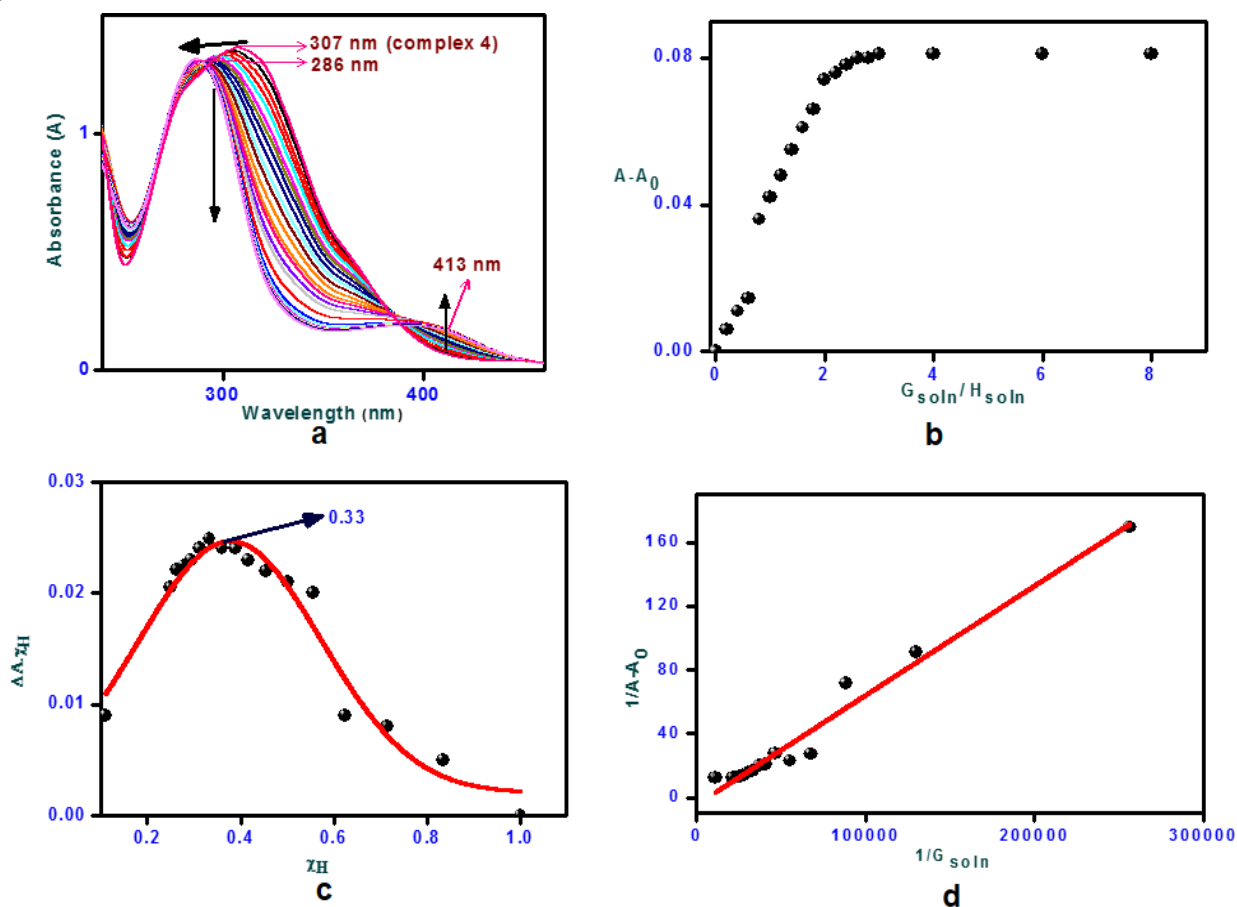

**Figure S32:** (a) Absorption spectral variation of complex **4** ( $2 \times 10^{-5} \text{ mol dm}^{-3}$ ) with the addition of 1-5 equivalent of copper nitrate trihydrate ( $2 \times 10^{-4} \text{ mol dm}^{-3}$ ) in DCM-methanol (1:9). (b) The stoichiometric plot of complex **4** with copper(II) nitrate trihydrate. (c) Job's plot of complex **4** with copper(II) nitrate trihydrate. (d) Benesi-Hildebrand plot complex **4** with the addition of copper(II) nitrate trihydrate.

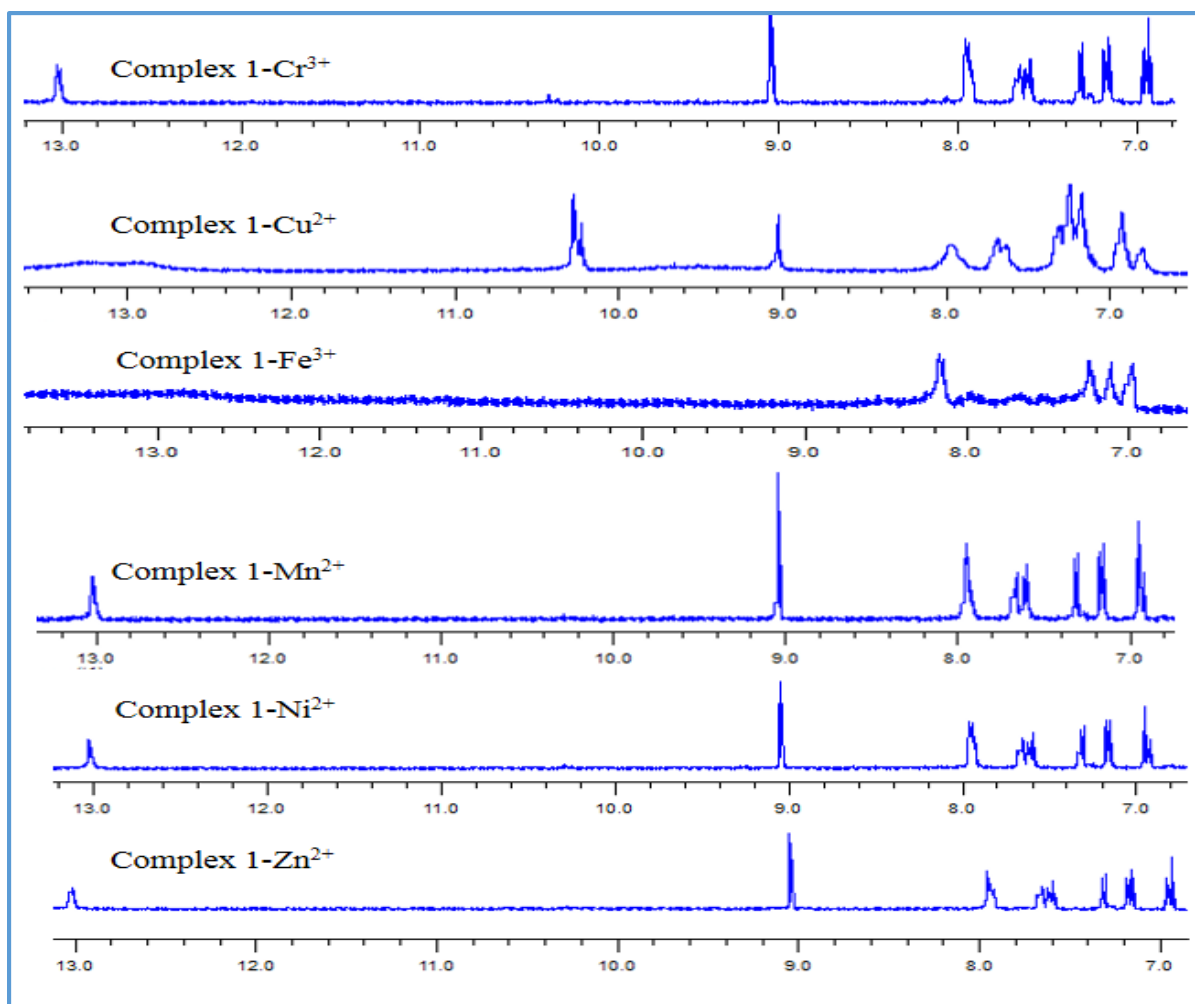

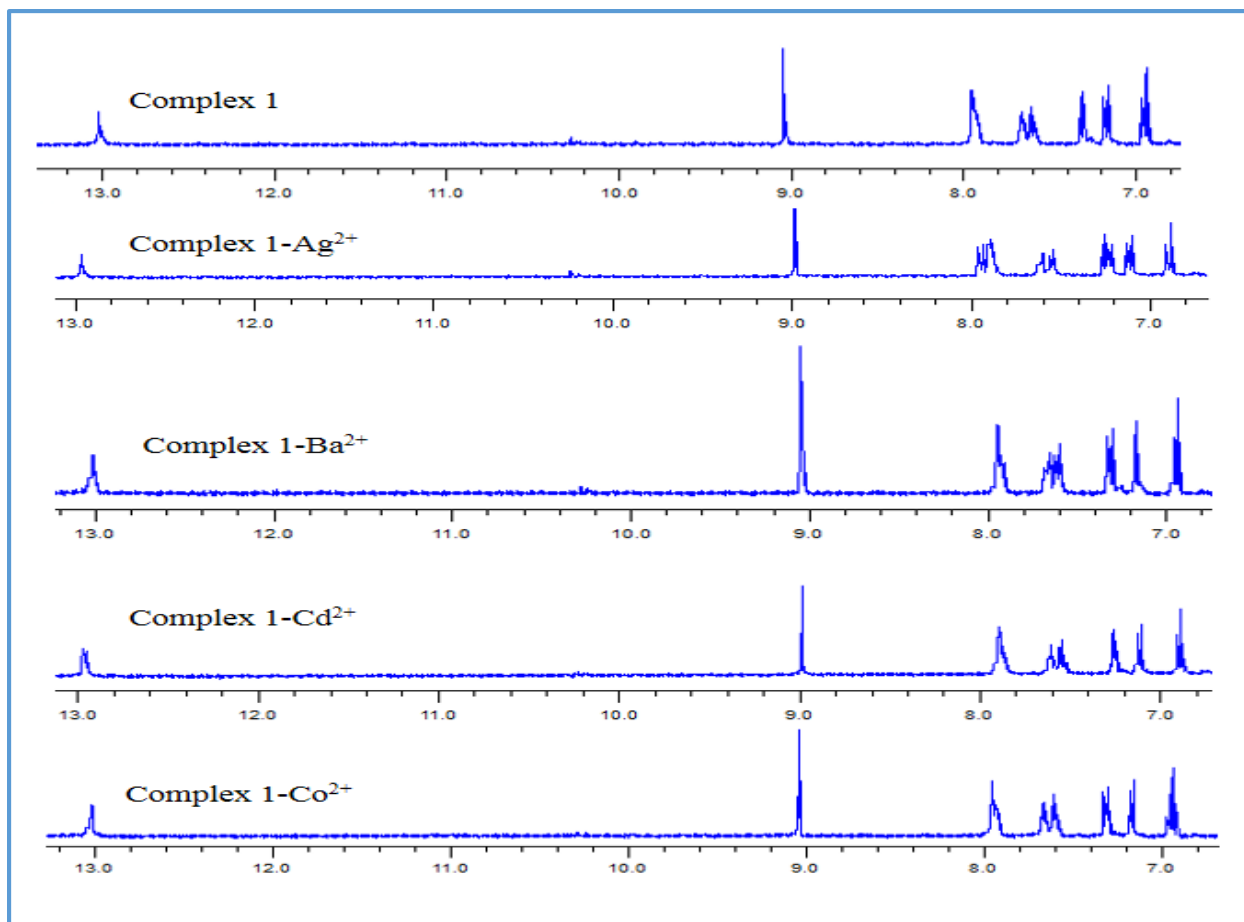

**Figure S33:** Changes in partial <sup>1</sup>H NMR spectra of complex **1** with the addition of an equivalent amount of selected metal ions in DMSO-d<sub>6</sub>.

#### **LOD (Limit of Detection) for complex 1-4 with Cu<sup>2+</sup> and Fe<sup>3+</sup> ion**

LOD was calculated for all complexes with Cu<sup>2+</sup> and Fe<sup>3+</sup> was calculated on the basis of absorption data. To determine the standard deviation for the absorbance, the absorbance of the individual receptors without any cation was measured by 15 times and the standard deviation of blank measurements was calculated.

The limit of detection (LOD) of the receptors for sensing Cu<sup>2+</sup> and Fe<sup>3+</sup> was determined from the following equation:

$$\text{LOD} = K \times \text{SD/S}$$

Where  $K = 3$  (according to IUPAC consideration ); SD is the standard deviation of the blank receptor (complex 1-4) solution; S is the slope of the calibration curve. From the linear fit graph, we get a slope for all complexes. Thus using the above formula we get the Limit of Detection.

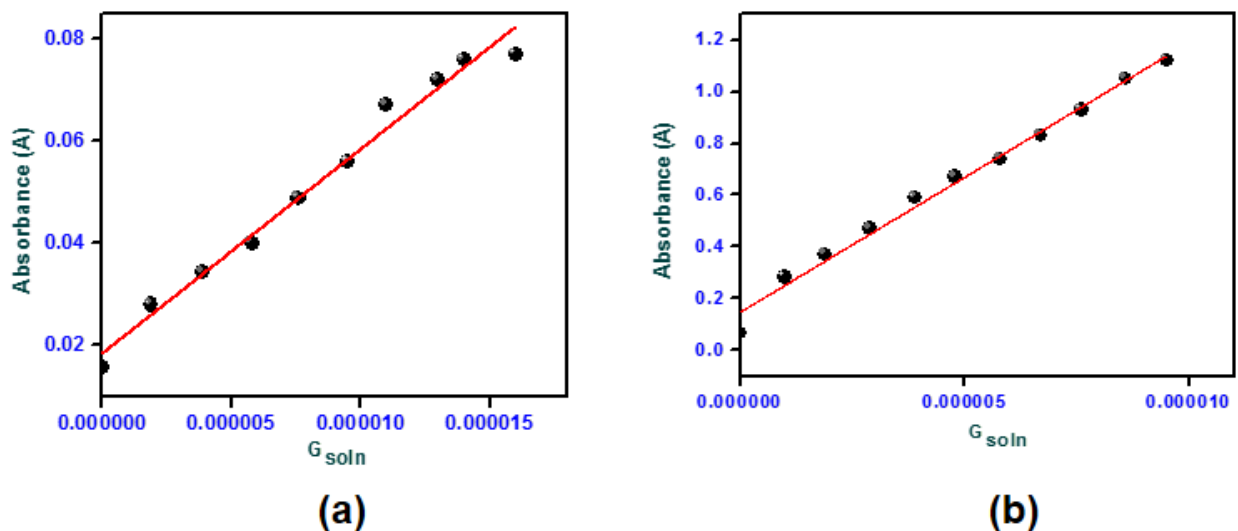

**Figure S34:** Graph between absorbance and concentration of guest for calculation of slope for (a)  $Cu^{2+}$  (b)  $Fe^{3+}$  for complex 1.

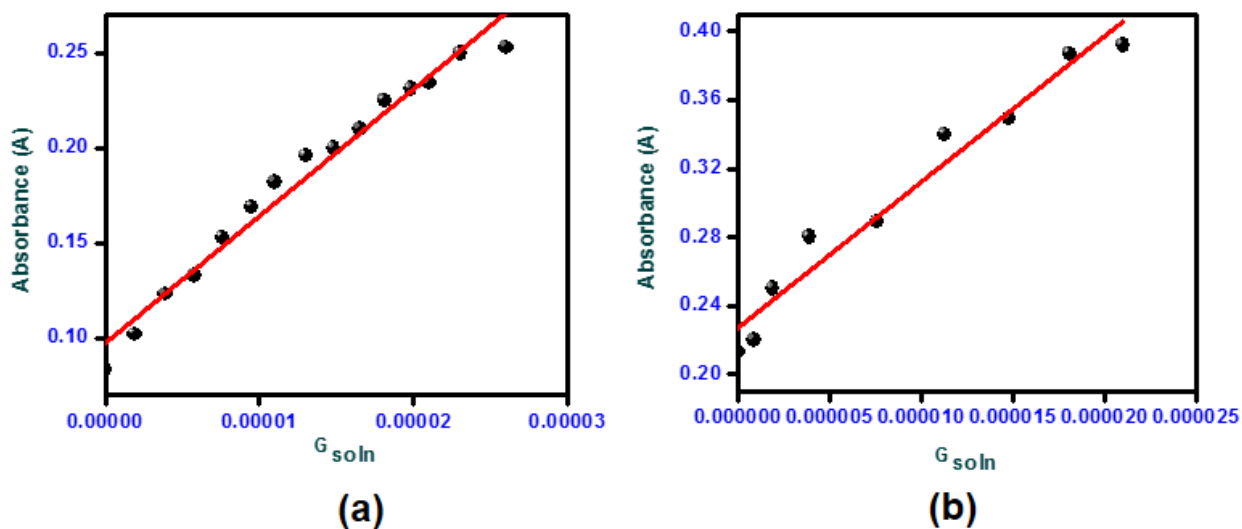

**Figure S35:** Graph between absorbance and concentration of guest for calculation of slope for (a)  $Cu^{2+}$  (b)  $Fe^{3+}$  for complex 3.

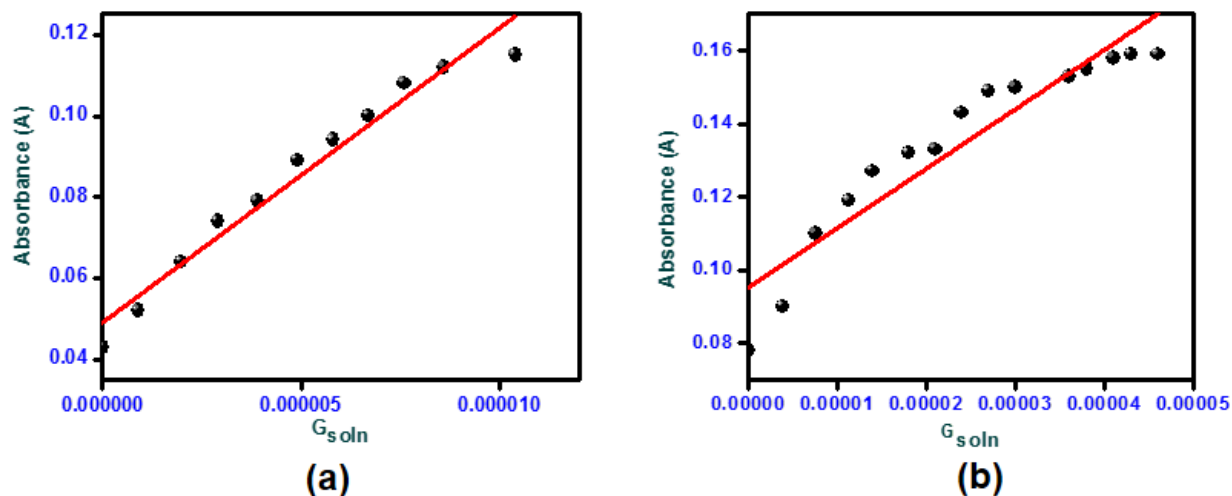

**Figure S36:** Graph between absorbance and concentration of guest for calculation of slope for (a)  $\text{Cu}^{2+}$  for complex 2 (b)  $\text{Cu}^{2+}$  for complex 4.

### *X-ray crystallography*

The intensity data of **1-4** were collected on a Rigaku SuperNova diffractometer equipped with an Eos S2 CCD detector, using  $\text{MoK}\alpha$  radiation with graphite monochromator ( $\lambda = 0.71073 \text{ \AA}$ ) at  $T = 293(2)$  or  $100(2)$  K. The structure was solved by SHELXT and refined on  $F^2$  by full-matrix least-squares methods using SHELXL using Olex2 as the graphical interface.<sup>1-2</sup> Non-hydrogen atoms were anisotropically refined. H-atoms were included in the refinement on calculated positions riding on their carrier atoms. The function minimized ( $F_o^2$ ) from counting statistics. The function  $R_1$  and  $wR_2$  were  $(\sigma||F_o| - |F_c|) / \sigma|F_o|$  and  $[\sigma w (F_o^2 - F_c^2)^2 / \sigma(wF_o^4)]^{1/2}$ , respectively. Crystallographic data (excluding structure factors) for the structures reported in this paper have been deposited in the Cambridge Crystallographic Data Centre as a supplementary publication no. CCDC 1895986-1895989. Copies of the data can be obtained free of charge on application to CCDC, 12 Union Road, Cambridge CB21EZ, UK (fax: + (44)1223-336-033; email: [deposit@ccdc.cam.ac.uk](mailto:deposit@ccdc.cam.ac.uk))

**References:**

1. Sheldrick, G.M., Crystal structure refinement with ShelXL, *Acta Cryst.*, (2015), C71, 3-8.
2. O.V. Dolomanov and L.J. Bourhis and R.J. Gildea and J.A.K. Howard and H. Puschmann, Olex2: A complete structure solution, refinement and analysis program, *J. Appl. Cryst.*, (2009), **42**, 339-341.
